# Supplementary material for: Liver Function Tests in COVID-19: Assessment of the Actual Prognostic Value
Source: MDPI journal article supplement (doi:10.3390/jcm11154490), 2022-08-01
Supplement: s1 [file s1]

Table S1. Model for NLR adjusted for comorbidities and potential risk factors, n=401.

|                                            | ICU admission |        |         |                         |         |            |         | Mechanical ventilation |        |         |                         |         |            |         | Fatal outcome |        |         |                         |         |            |         |
|--------------------------------------------|---------------|--------|---------|-------------------------|---------|------------|---------|------------------------|--------|---------|-------------------------|---------|------------|---------|---------------|--------|---------|-------------------------|---------|------------|---------|
|                                            |               |        |         | p-value<br>for<br>model |         | LR p-value |         |                        |        |         | p-value<br>for<br>model |         | LR p-value |         |               |        |         | p-value<br>for<br>model |         | LR p-value |         |
|                                            | OR            | CI 95% | p-value |                         | NG      |            |         | OR                     | CI 95% | p-value |                         | NG      |            |         | OR            | CI 95% | p-value |                         | NG      |            |         |
|                                            |               | 2.5%   | 97.5%   |                         |         |            |         |                        | 2.5%   | 97.5%   |                         |         |            |         |               | 2.5%   | 97.5%   |                         |         |            |         |
| NLR                                        | 1.033         | 1.015  | 1.060   | 0.001                   | <0.0001 | 0.278      | <0.0001 | 1.032                  | 1.014  | 1.050   | 0.001                   | <0.0001 | 0.280      | <0.0001 | 1.031         | 1.011  | 1.060   | 0.006                   | <0.0001 | 0.179      | <0.0001 |
| Hypertension                               | 1.141         | 0.688  | 1.900   | 0.609                   |         |            |         | 1.420                  | 0.850  | 2.390   | 0.183                   |         |            |         | 1.581         | 0.944  | 2.670   | 0.083                   |         |            |         |
| Diabetes -1                                | 0.045         | <0.001 | 0.850   | 0.146                   |         |            |         | 0.055                  | <0.001 | 0.900   | 0.143                   |         |            |         | 0.523         | 0.069  | 2.580   | 0.466                   |         |            |         |
| Diabetes -2                                | 1.160         | 0.604  | 2.210   | 0.652                   |         |            |         | 1.186                  | 0.611  | 2.280   | 0.610                   |         |            |         | 1.355         | 0.736  | 2.470   | 0.325                   |         |            |         |
| Diabetes -3                                | 1.468         | 0.536  | 3.910   | 0.444                   |         |            |         | 1.650                  | 0.593  | 4.500   | 0.328                   |         |            |         | 1.005         | 0.394  | 2.450   | 0.991                   |         |            |         |
| Diabetes - 4                               | 1.518         | 0.349  | 6.400   | 0.566                   |         |            |         | 1.520                  | 0.347  | 6.490   | 0.567                   |         |            |         | 2.733         | 0.673  | 11.270  | 0.152                   |         |            |         |
| Asthma                                     | 1.281         | 0.376  | 4.260   | 0.683                   |         |            |         | 0.938                  | 0.259  | 3.130   | 0.918                   |         |            |         | 0.716         | 0.154  | 2.470   | 0.626                   |         |            |         |
| COPD                                       | <0.001        | <0.001 | >1000   | 0.992                   |         |            |         | <0.001                 | <0.001 | >1000   | 0.991                   |         |            |         | 1.117         | 0.263  | 4.180   | 0.873                   |         |            |         |
| Dementia                                   | <0.001        | <0.001 | >1000   | 0.988                   |         |            |         | <0.001                 | <0.001 | >1000   | 0.988                   |         |            |         | 3.509         | 1.461  | 8.830   | 0.006                   |         |            |         |
| Stroke/TIA in patient history              | 0.533         | 0.194  | 1.320   | 0.193                   |         |            |         | 0.595                  | 0.217  | 1.480   | 0.283                   |         |            |         | 0.948         | 0.427  | 2.040   | 0.892                   |         |            |         |
| Chronic kidney disease                     | 0.316         | 0.147  | 0.640   | 0.002                   |         |            |         | 0.306                  | 0.140  | 0.630   | 0.002                   |         |            |         | 0.753         | 0.407  | 1.360   | 0.356                   |         |            |         |
| Active smoker                              | 0.611         | 0.149  | 2.130   | 0.458                   |         |            |         | 0.464                  | 0.096  | 1.710   | 0.282                   |         |            |         | 1.022         | 0.326  | 2.970   | 0.969                   |         |            |         |
| Former smoker                              | 0.427         | 0.107  | 1.400   | 0.185                   |         |            |         | 0.327                  | 0.068  | 1.160   | 0.110                   |         |            |         | 0.776         | 0.244  | 2.250   | 0.651                   |         |            |         |
| Myocardial infraction in patient history   | 1.452         | 0.659  | 3.180   | 0.350                   |         |            |         | 1.345                  | 0.594  | 3.010   | 0.471                   |         |            |         | 2.496         | 1.271  | 4.960   | 0.008                   |         |            |         |
| Heart failure                              | 0.762         | 0.351  | 1.600   | 0.481                   |         |            |         | 0.544                  | 0.238  | 1.180   | 0.132                   |         |            |         | 1.387         | 0.727  | 2.630   | 0.316                   |         |            |         |
| Leukemia                                   | 3.416         | 0.795  | 15.690  | 0.097                   |         |            |         | 1.254                  | 0.236  | 5.500   | 0.771                   |         |            |         | 5.147         | 1.264  | 25.860  | 0.028                   |         |            |         |
| Solid malignant disease without metastases | 0.706         | 0.242  | 1.900   | 0.501                   |         |            |         | 0.597                  | 0.196  | 1.630   | 0.332                   |         |            |         | 1.425         | 0.566  | 3.530   | 0.443                   |         |            |         |
| Solid malignant disease with metastases    | <0.001        | <0.001 | >1000   | 0.993                   |         |            |         | <0.001                 | <0.001 | >1000   | 0.993                   |         |            |         | 0.162         | 0.008  | 1.000   | 0.102                   |         |            |         |
| Lymphoma                                   | <0.001        | <0.001 | >1000   | 0.992                   |         |            |         | <0.001                 | <0.001 | >1000   | 0.992                   |         |            |         | 0.628         | 0.082  | 3.100   | 0.600                   |         |            |         |
| Length of hospital stay                    | 1.020         | 1.006  | 1.030   | 0.006                   |         |            |         | 1.019                  | 1.005  | 1.030   | 0.008                   |         |            |         | 0.992         | 0.978  | 1.010   | 0.266                   |         |            |         |

OR: Odds Ratio; 95% CI: Confidence Interval; NG: Nagelkerke pseudo R<sup>2</sup>; LR: Likelihood Ratio; ICU: intensive care unit; NLR: neutrophil-to-lymphocyte ratio; Diabetes-1:diabetes mellitus type 1. including LADA; Diabetes-2: diabetes mellitus type 2 treated with oral medications; Diabetes-3: diabetes mellitus type 2 treated with insulin; Diabetes-4: prediabetes; COPD: chronic obstructive pulmonary disease; TIA: transient ischemic attack

Table S2. Model for TBIL adjusted for comorbidities and potential risk factors, n=401.

|                                            | ICU admission |        |        |         |                         |       |                | Mechanical ventilation |        |       |         |                         |       | Fatal outcome  |       |        |        |         |                         |       |                |
|--------------------------------------------|---------------|--------|--------|---------|-------------------------|-------|----------------|------------------------|--------|-------|---------|-------------------------|-------|----------------|-------|--------|--------|---------|-------------------------|-------|----------------|
|                                            | OR            | CI 95% |        | p-value | p-value<br>for<br>model | NG    | LR p-<br>value | OR                     | CI 95% |       | p-value | p-value<br>for<br>model | NG    | LR p-<br>value | OR    | CI 95% |        | p-value | p-value<br>for<br>model | NG    | LR p-<br>value |
|                                            |               | 2.5%   | 97.5%  |         |                         |       |                |                        | 2.5%   | 97.5% |         |                         |       |                |       | 2.5%   | 97.5%  |         |                         |       |                |
| TBIL                                       | 0.965         | 0.698  | 1.270  | 0.805   | 0.001                   | 0.237 | <0.0001        | 0.985                  | 0.717  | 1.300 | 0.919   | 0.00042                 | 0.240 | <0.0001        | 1.598 | 1.189  | 2.250  | 0.004   | <0.0001                 | 0.177 | <0.0001        |
| Hypertension                               | 1.177         | 0.716  | 1.940  | 0.522   |                         |       |                | 1.452                  | 0.876  | 2.430 | 0.150   |                         |       |                | 1.712 | 1.021  | 2.900  | 0.043   |                         |       |                |
| Diabetes -1                                | 0.238         | 0.012  | 1.500  | 0.197   |                         |       |                | 0.246                  | 0.012  | 1.570 | 0.210   |                         |       |                | 0.722 | 0.132  | 3.100  | 0.678   |                         |       |                |
| Diabetes -2                                | 1.084         | 0.566  | 2.050  | 0.805   |                         |       |                | 1.104                  | 0.572  | 2.110 | 0.766   |                         |       |                | 1.481 | 0.804  | 2.710  | 0.204   |                         |       |                |
| Diabetes -3                                | 1.206         | 0.447  | 3.140  | 0.704   |                         |       |                | 1.366                  | 0.499  | 3.630 | 0.534   |                         |       |                | 0.935 | 0.368  | 2.270  | 0.884   |                         |       |                |
| Diabetes - 4                               | 1.354         | 0.318  | 5.610  | 0.672   |                         |       |                | 1.360                  | 0.317  | 5.710 | 0.670   |                         |       |                | 2.832 | 0.703  | 11.520 | 0.135   |                         |       |                |
| Asthma                                     | 1.524         | 0.459  | 4.970  | 0.480   |                         |       |                | 1.132                  | 0.320  | 3.700 | 0.839   |                         |       |                | 0.970 | 0.210  | 3.320  | 0.965   |                         |       |                |
| COPD                                       | <0.001        | <0.001 | >1000  | 0.992   |                         |       |                | <0.001                 | <0.001 | >1000 | 0.992   |                         |       |                | 0.810 | 0.179  | 3.130  | 0.768   |                         |       |                |
| Dementia                                   | <0.001        | <0.001 | >1000  | 0.988   |                         |       |                | <0.001                 | <0.001 | >1000 | 0.988   |                         |       |                | 3.438 | 1.428  | 8.670  | 0.007   |                         |       |                |
| Stroke/TIA in patient history              | 0.647         | 0.249  | 1.550  | 0.345   |                         |       |                | 0.722                  | 0.277  | 1.740 | 0.482   |                         |       |                | 0.998 | 0.452  | 2.140  | 0.996   |                         |       |                |
| Chronic kiedney disease                    | 0.332         | 0.159  | 0.650  | 0.002   |                         |       |                | 0.321                  | 0.151  | 0.640 | 0.002   |                         |       |                | 0.787 | 0.427  | 1.420  | 0.433   |                         |       |                |
| Active smoker                              | 0.534         | 0.131  | 1.840  | 0.341   |                         |       |                | 0.397                  | 0.081  | 1.470 | 0.198   |                         |       |                | 0.940 | 0.303  | 2.710  | 0.911   |                         |       |                |
| Former smoker                              | 0.410         | 0.105  | 1.310  | 0.157   |                         |       |                | 0.317                  | 0.068  | 1.090 | 0.095   |                         |       |                | 0.735 | 0.232  | 2.130  | 0.581   |                         |       |                |
| Myocardial infraction in patient history   | 1.653         | 0.768  | 3.560  | 0.196   |                         |       |                | 1.544                  | 0.703  | 3.380 | 0.275   |                         |       |                | 2.728 | 1.394  | 5.420  | 0.004   |                         |       |                |
| Heart failure                              | 0.835         | 0.392  | 1.730  | 0.632   |                         |       |                | 0.609                  | 0.275  | 1.290 | 0.206   |                         |       |                | 1.249 | 0.656  | 2.360  | 0.494   |                         |       |                |
| Leukemia                                   | 2.906         | 0.681  | 13.090 | 0.146   |                         |       |                | 1.089                  | 0.202  | 4.780 | 0.914   |                         |       |                | 4.898 | 1.198  | 24.520 | 0.033   |                         |       |                |
| Solid malignant disease without metastases | 0.772         | 0.265  | 2.080  | 0.617   |                         |       |                | 0.647                  | 0.211  | 1.780 | 0.417   |                         |       |                | 1.422 | 0.548  | 3.600  | 0.459   |                         |       |                |
| Solid malignant disease with metastases    | <0.001        | <0.001 | >1000  | 0.993   |                         |       |                | <0.001                 | <0.001 | >1000 | 0.993   |                         |       |                | 0.102 | 0.005  | 0.710  | 0.055   |                         |       |                |
| Lymphoma                                   | <0.001        | <0.001 | >1000  | 0.992   |                         |       |                | <0.001                 | <0.001 | >1000 | 0.992   |                         |       |                | 0.611 | 0.077  | 3.110  | 0.587   |                         |       |                |
| Lenght of hospital stav                    | 1.020         | 1.007  | 1.030  | 0.004   |                         |       |                | 1.020                  | 1.006  | 1.030 | 0.005   |                         |       |                | 0.992 | 0.978  | 1.010  | 0.260   |                         |       |                |

OR: Odds Ratio; 95% CI: Confidence Interval; NG: Nagelkerke pseudo R<sup>2</sup>; LR: Likelihood Ratio; ICU: intensive care unit; TBIL: total bilirubin; Diabetes-1:diabetes mellitus type 1. including LADA; Diabetes-2: diabetes mellitus type 2 treated with oral medications; Diabetes-3: diabetes mellitus type 2 treated with insulin; Diabetes-4: prediabetes; COPD: chronic obstructive pulmonary disease; TIA: transient ischemic attack

Table S3. Model for ALP adjusted for comorbidities and potential risk factors, n=401.

|  | ICU admission | Mechanical ventilation | Fatal outcome |
|--|---------------|------------------------|---------------|
|--|---------------|------------------------|---------------|

|                                            | p-value<br>for<br>model |        |        |         |       |            |         | p-value<br>for<br>model |        |       |         |       |            |         | p-value<br>for<br>model |        |        |         |         |            |        |
|--------------------------------------------|-------------------------|--------|--------|---------|-------|------------|---------|-------------------------|--------|-------|---------|-------|------------|---------|-------------------------|--------|--------|---------|---------|------------|--------|
|                                            | OR                      | CI 95% |        | p-value | NG    | LR p-value |         | OR                      | CI 95% |       | p-value | NG    | LR p-value |         | OR                      | CI 95% |        | p-value | NG      | LR p-value |        |
|                                            |                         | 2.5%   | 97.5%  |         |       |            |         |                         | 2.5%   | 97.5% |         |       |            |         |                         | 2.5%   | 97.5%  |         |         |            |        |
| ALP                                        | 0.999                   | 0.996  | 1.000  | 0.410   | 0.002 | 0.239      | <0.0001 | 0.999                   | 0.996  | 1.000 | 0.486   | 0.001 | 0.242      | <0.0001 | 1.002                   | 1.000  | 1.000  | 0.087   | <0.0001 | 0.156      | 0.0005 |
| Hypertension                               | 1.178                   | 0.716  | 1.950  | 0.520   |       |            |         | 1.453                   | 0.876  | 2.430 | 0.150   |       |            |         | 1.602                   | 0.961  | 2.690  | 0.073   |         |            |        |
| Diabetes -1                                | 0.266                   | 0.013  | 1.750  | 0.240   |       |            |         | 0.273                   | 0.014  | 1.810 | 0.251   |       |            |         | 0.485                   | 0.085  | 2.160  | 0.370   |         |            |        |
| Diabetes -2                                | 1.086                   | 0.568  | 2.050  | 0.801   |       |            |         | 1.102                   | 0.572  | 2.100 | 0.769   |       |            |         | 1.347                   | 0.733  | 2.450  | 0.332   |         |            |        |
| Diabetes -3                                | 1.202                   | 0.446  | 3.130  | 0.708   |       |            |         | 1.362                   | 0.498  | 3.620 | 0.538   |       |            |         | 0.938                   | 0.371  | 2.260  | 0.889   |         |            |        |
| Diabetes - 4                               | 1.346                   | 0.317  | 5.570  | 0.677   |       |            |         | 1.350                   | 0.315  | 5.650 | 0.677   |       |            |         | 2.648                   | 0.656  | 10.840 | 0.163   |         |            |        |
| Asthma                                     | 1.600                   | 0.482  | 5.220  | 0.430   |       |            |         | 1.173                   | 0.331  | 3.840 | 0.794   |       |            |         | 0.823                   | 0.179  | 2.800  | 0.773   |         |            |        |
| COPD                                       | <0.001                  | <0.001 | >1000  | 0.992   |       |            |         | <0.001                  | <0.001 | >1000 | 0.992   |       |            |         | 0.938                   | 0.221  | 3.490  | 0.926   |         |            |        |
| Dementia                                   | <0.001                  | <0.001 | >1000  | 0.988   |       |            |         | <0.001                  | <0.001 | >1000 | 0.988   |       |            |         | 3.370                   | 1.410  | 8.420  | 0.007   |         |            |        |
| Stroke/TIA in patient history              | 0.638                   | 0.246  | 1.530  | 0.330   |       |            |         | 0.714                   | 0.274  | 1.720 | 0.467   |       |            |         | 1.060                   | 0.485  | 2.260  | 0.881   |         |            |        |
| Chronic kidney disease                     | 0.335                   | 0.161  | 0.660  | 0.002   |       |            |         | 0.323                   | 0.152  | 0.640 | 0.002   |       |            |         | 0.752                   | 0.410  | 1.350  | 0.347   |         |            |        |
| Active smoker                              | 0.526                   | 0.129  | 1.820  | 0.330   |       |            |         | 0.391                   | 0.080  | 1.450 | 0.191   |       |            |         | 0.984                   | 0.319  | 2.820  | 0.976   |         |            |        |
| Former smoker                              | 0.410                   | 0.105  | 1.310  | 0.157   |       |            |         | 0.318                   | 0.068  | 1.090 | 0.095   |       |            |         | 0.743                   | 0.238  | 2.120  | 0.590   |         |            |        |
| Myocardial infraction in patient history   | 1.643                   | 0.763  | 3.540  | 0.202   |       |            |         | 1.530                   | 0.695  | 3.350 | 0.286   |       |            |         | 2.733                   | 1.402  | 5.410  | 0.003   |         |            |        |
| Heart failure                              | 0.833                   | 0.391  | 1.720  | 0.627   |       |            |         | 0.609                   | 0.275  | 1.290 | 0.206   |       |            |         | 1.427                   | 0.756  | 2.670  | 0.268   |         |            |        |
| Leukemia                                   | 2.964                   | 0.693  | 13.370 | 0.139   |       |            |         | 1.098                   | 0.203  | 4.830 | 0.905   |       |            |         | 4.397                   | 1.079  | 22.010 | 0.046   |         |            |        |
| Solid malignant disease without metastases | 0.815                   | 0.278  | 2.220  | 0.696   |       |            |         | 0.684                   | 0.221  | 1.900 | 0.481   |       |            |         | 1.400                   | 0.548  | 3.500  | 0.472   |         |            |        |
| Solid malignant disease with metastases    | <0.001                  | <0.001 | >1000  | 0.993   |       |            |         | <0.001                  | <0.001 | >1000 | 0.993   |       |            |         | 0.132                   | 0.007  | 0.850  | 0.074   |         |            |        |
| Lymphoma                                   | <0.001                  | <0.001 | >1000  | 0.992   |       |            |         | <0.001                  | <0.001 | >1000 | 0.992   |       |            |         | 0.596                   | 0.080  | 2.880  | 0.555   |         |            |        |
| Length of hospital stay                    | 1.021                   | 1.007  | 1.040  | 0.003   |       |            |         | 1.021                   | 1.007  | 1.040 | 0.004   |       |            |         | 0.992                   | 0.978  | 1.000  | 0.236   |         |            |        |

OR: Odds Ratio; 95% CI: Confidence Interval; NG: Nagelkerke pseudo R<sup>2</sup>; LR: Likelihood Ratio; ICU: intensive care unit; ALP:alkaline phosphatase; Diabetes-1:diabetes mellitus type 1. including LADA; Diabetes-2: diabetes mellitus type 2 treated with oral medications; Diabetes-3: diabetes mellitus type 2 treated with insulin; Diabetes-4: prediabetes; COPD: chronic obstructive pulmonary disease; TIA: transient ischemic attack

Table S4. Model for ALT adjusted for comorbidities and potential risk factors, n=401.

|  | ICU admission | Mechanical ventilation | Fatal outcome |
|--|---------------|------------------------|---------------|
|--|---------------|------------------------|---------------|

|                                            | p-value<br>for<br>model |        |        |         |        |            |         | p-value<br>for<br>model |        |       |         |        |            |         | p-value<br>for<br>model |        |        |         |         |            |        |
|--------------------------------------------|-------------------------|--------|--------|---------|--------|------------|---------|-------------------------|--------|-------|---------|--------|------------|---------|-------------------------|--------|--------|---------|---------|------------|--------|
|                                            | OR                      | CI 95% |        | p-value | NG     | LR p-value |         | OR                      | CI 95% |       | p-value | NG     | LR p-value |         | OR                      | CI 95% |        | p-value | NG      | LR p-value |        |
|                                            |                         | 2.5%   | 97.5%  |         |        |            |         |                         | 2.5%   | 97.5% |         |        |            |         |                         | 2.5%   | 97.5%  |         |         |            |        |
| ALT                                        | 1.000                   | 0.998  | 1.000  | 0.553   | 0.0002 | 0.238      | <0.0001 | 1.000                   | 0.999  | 1.000 | 0.464   | 0.0001 | 0.242      | <0.0001 | 1.002                   | 1.000  | 1.000  | 0.133   | <0.0001 | 0.155      | 0.0005 |
| Hypertension                               | 1.190                   | 0.725  | 1.980  | 0.486   |        |            |         | 1.480                   | 0.890  | 2.480 | 0.133   |        |            |         | 1.685                   | 1.009  | 2.840  | 0.048   |         |            |        |
| Diabetes -1                                | 0.241                   | 0.012  | 1.520  | 0.201   |        |            |         | 0.249                   | 0.013  | 1.590 | 0.215   |        |            |         | 0.636                   | 0.116  | 2.740  | 0.566   |         |            |        |
| Diabetes -2                                | 1.100                   | 0.575  | 2.070  | 0.777   |        |            |         | 1.110                   | 0.578  | 2.120 | 0.747   |        |            |         | 1.341                   | 0.731  | 2.440  | 0.338   |         |            |        |
| Diabetes -3                                | 1.190                   | 0.441  | 3.110  | 0.723   |        |            |         | 1.340                   | 0.489  | 3.570 | 0.560   |        |            |         | 0.887                   | 0.351  | 2.130  | 0.792   |         |            |        |
| Diabetes - 4                               | 1.280                   | 0.323  | 5.720  | 0.654   |        |            |         | 1.380                   | 0.322  | 5.800 | 0.654   |        |            |         | 2.662                   | 0.658  | 10.930 | 0.162   |         |            |        |
| Asthma                                     | 1.440                   | 0.420  | 4.790  | 0.547   |        |            |         | 1.040                   | 0.282  | 3.490 | 0.949   |        |            |         | 0.719                   | 0.144  | 2.550  | 0.641   |         |            |        |
| COPD                                       | <0.001                  | <0.001 | >1000  | 0.992   |        |            |         | <0.001                  | <0.001 | >1000 | 0.992   |        |            |         | 0.986                   | 0.233  | 3.650  | 0.983   |         |            |        |
| Dementia                                   | <0.001                  | <0.001 | >1000  | 0.987   |        |            |         | <0.001                  | <0.001 | >1000 | 0.987   |        |            |         | 3.053                   | 1.250  | 7.750  | 0.016   |         |            |        |
| Stroke/TIA in patient history              | 0.660                   | 0.254  | 1.580  | 0.368   |        |            |         | 0.740                   | 0.283  | 1.780 | 0.516   |        |            |         | 1.056                   | 0.482  | 2.250  | 0.889   |         |            |        |
| Chronic kidney disease                     | 0.336                   | 0.161  | 0.660  | 0.002   |        |            |         | 0.324                   | 0.153  | 0.650 | 0.002   |        |            |         | 0.774                   | 0.423  | 1.390  | 0.396   |         |            |        |
| Active smoker                              | 0.538                   | 0.132  | 1.850  | 0.347   |        |            |         | 0.400                   | 0.082  | 1.480 | 0.200   |        |            |         | 0.935                   | 0.300  | 2.690  | 0.903   |         |            |        |
| Former smoker                              | 0.412                   | 0.106  | 1.320  | 0.159   |        |            |         | 0.321                   | 0.069  | 1.100 | 0.098   |        |            |         | 0.750                   | 0.241  | 2.140  | 0.601   |         |            |        |
| Myocardial infraction in patient history   | 1.680                   | 0.780  | 3.620  | 0.183   |        |            |         | 1.570                   | 0.714  | 3.440 | 0.258   |        |            |         | 2.711                   | 1.394  | 5.350  | 0.004   |         |            |        |
| Heart failure                              | 0.825                   | 0.388  | 1.700  | 0.607   |        |            |         | 0.604                   | 0.273  | 1.280 | 0.198   |        |            |         | 1.437                   | 0.762  | 2.690  | 0.258   |         |            |        |
| Leukemia                                   | 2.950                   | 0.693  | 13.280 | 0.139   |        |            |         | 1.110                   | 0.205  | 4.860 | 0.896   |        |            |         | 4.600                   | 1.128  | 23.020 | 0.040   |         |            |        |
| Solid malignant disease without metastases | 0.768                   | 0.265  | 2.050  | 0.608   |        |            |         | 0.649                   | 0.212  | 1.770 | 0.418   |        |            |         | 1.597                   | 0.639  | 3.930  | 0.307   |         |            |        |
| Solid malignant disease with metastases    | <0.001                  | <0.001 | >1000  | 0.993   |        |            |         | <0.001                  | <0.001 | >1000 | 0.993   |        |            |         | 0.173                   | 0.009  | 1.030  | 0.109   |         |            |        |
| Lymphoma                                   | <0.001                  | <0.001 | >1000  | 0.992   |        |            |         | <0.001                  | <0.001 | >1000 | 0.992   |        |            |         | 0.613                   | 0.082  | 2.960  | 0.575   |         |            |        |
| Length of hospital stay                    | 1.020                   | 1.010  | 1.030  | 0.004   |        |            |         | 1.020                   | 1.010  | 1.030 | 0.005   |        |            |         | 0.993                   | 0.979  | 1.010  | 0.315   |         |            |        |

OR: Odds Ratio; 95% CI: Confidence Interval; NG: Nagelkerke pseudo R<sup>2</sup>; LR: Likelihood Ratio; ICU: intensive care unit; ALT:alanine aminotransferase; Diabetes-1:diabetes mellitus type 1. including LADA; Diabetes-2: diabetes mellitus type 2 treated with oral medications; Diabetes-3: diabetes mellitus type 2 treated with insulin; Diabetes-4: prediabetes; COPD: chronic obstructive pulmonary disease; TIA: transient ischemic attack

Table S5. Model for AST adjusted for comorbidities and potential risk factors, n=401.

|  | ICU admission | Mechanical ventilation | Fatal outcome |
|--|---------------|------------------------|---------------|
|--|---------------|------------------------|---------------|

|                                            | ICU admission |        |         |                   |            |       |         | Mechanical ventilation |        |         |                   |            |       |         | Fatal outcome |       |         |                   |            |       |         |
|--------------------------------------------|---------------|--------|---------|-------------------|------------|-------|---------|------------------------|--------|---------|-------------------|------------|-------|---------|---------------|-------|---------|-------------------|------------|-------|---------|
|                                            | OR            |        |         | p-value for model |            |       |         | OR                     |        |         | p-value for model |            |       |         | OR            |       |         | p-value for model |            |       |         |
|                                            | 2.5%          | 97.5%  | p-value | NG                | LR p-value |       |         | 2.5%                   | 97.5%  | p-value | NG                | LR p-value |       |         | 2.5%          | 97.5% | p-value | NG                | LR p-value |       |         |
| AST                                        | 1.000         | 0.998  | 1.000   | 0.601             | 0.0003     | 0.237 | <0.0001 | 1.000                  | 0.999  | 1.000   | 0.319             | 0.0001     | 0.243 | <0.0001 | 1.004         | 1.001 | 1.010   | 0.008             | <0.0001    | 0.178 | <0.0001 |
| Hypertension                               | 1.190         | 0.722  | 1.960   | 0.499             |            |       |         | 1.480                  | 0.890  | 2.480   | 0.133             |            |       |         | 1.743         | 1.039 | 2.960   | 0.037             |            |       |         |
| Diabetes -1                                | 0.239         | 0.012  | 1.510   | 0.200             |            |       |         | 0.248                  | 0.013  | 1.590   | 0.213             |            |       |         | 0.629         | 0.114 | 2.720   | 0.558             |            |       |         |
| Diabetes -2                                | 1.100         | 0.574  | 2.070   | 0.780             |            |       |         | 1.110                  | 0.578  | 2.120   | 0.747             |            |       |         | 1.338         | 0.726 | 2.440   | 0.345             |            |       |         |
| Diabetes -3                                | 1.180         | 0.434  | 3.090   | 0.739             |            |       |         | 1.300                  | 0.471  | 3.480   | 0.604             |            |       |         | 0.760         | 0.291 | 1.870   | 0.559             |            |       |         |
| Diabetes - 4                               | 1.380         | 0.323  | 5.700   | 0.656             |            |       |         | 1.390                  | 0.323  | 5.820   | 0.649             |            |       |         | 2.739         | 0.670 | 11.350  | 0.153             |            |       |         |
| Asthma                                     | 1.480         | 0.439  | 4.880   | 0.511             |            |       |         | 1.050                  | 0.286  | 3.510   | 0.934             |            |       |         | 0.650         | 0.112 | 2.480   | 0.572             |            |       |         |
| COPD                                       | <0.001        | <0.001 | >1000   | 0.992             |            |       |         | <0.001                 | <0.001 | >1000   | 0.992             |            |       |         | 1.002         | 0.236 | 3.720   | 0.997             |            |       |         |
| Dementia                                   | <0.001        | <0.001 | >1000   | 0.987             |            |       |         | <0.001                 | <0.001 | >1000   | 0.984             |            |       |         | 2.976         | 1.206 | 7.600   | 0.019             |            |       |         |
| Stroke/TIA in patient history              | 0.649         | 0.250  | 1.550   | 0.348             |            |       |         | 0.727                  | 0.279  | 1.750   | 0.490             |            |       |         | 1.028         | 0.465 | 2.210   | 0.945             |            |       |         |
| Chronic kidney disease                     | 0.342         | 0.163  | 0.680   | 0.003             |            |       |         | 0.337                  | 0.158  | 0.680   | 0.003             |            |       |         | 0.860         | 0.466 | 1.550   | 0.621             |            |       |         |
| Active smoker                              | 0.544         | 0.134  | 1.880   | 0.356             |            |       |         | 0.410                  | 0.084  | 1.520   | 0.213             |            |       |         | 0.951         | 0.298 | 2.770   | 0.929             |            |       |         |
| Former smoker                              | 0.413         | 0.106  | 1.320   | 0.160             |            |       |         | 0.322                  | 0.069  | 1.110   | 0.099             |            |       |         | 0.762         | 0.242 | 2.200   | 0.625             |            |       |         |
| Myocardial infraction in patient history   | 1.680         | 0.779  | 3.610   | 0.184             |            |       |         | 1.580                  | 0.718  | 3.460   | 0.253             |            |       |         | 2.805         | 1.437 | 5.560   | 0.003             |            |       |         |
| Heart failure                              | 0.821         | 0.386  | 1.700   | 0.601             |            |       |         | 0.597                  | 0.269  | 1.270   | 0.190             |            |       |         | 1.377         | 0.725 | 2.590   | 0.323             |            |       |         |
| Leukemia                                   | 2.970         | 0.696  | 13.340  | 0.138             |            |       |         | 1.130                  | 0.209  | 4.950   | 0.877             |            |       |         | 5.026         | 1.225 | 25.290  | 0.030             |            |       |         |
| Solid malignant disease without metastases | 0.753         | 0.260  | 2.020   | 0.582             |            |       |         | 0.627                  | 0.205  | 1.720   | 0.383             |            |       |         | 1.512         | 0.594 | 3.780   | 0.376             |            |       |         |
| Solid malignant disease with metastases    | <0.001        | <0.001 | >1000   | 0.993             |            |       |         | <0.001                 | <0.001 | >1000   | 0.993             |            |       |         | 0.179         | 0.009 | 1.080   | 0.118             |            |       |         |
| Lymphoma                                   | <0.001        | <0.001 | >1000   | 0.992             |            |       |         | <0.001                 | <0.001 | >1000   | 0.992             |            |       |         | 0.675         | 0.090 | 3.290   | 0.655             |            |       |         |
| Length of hospital stay                    | 1.020         | 1.010  | 1.030   | 0.004             |            |       |         | 1.020                  | 1.010  | 1.030   | 0.005             |            |       |         | 0.993         | 0.979 | 1.010   | 0.321             |            |       |         |

OR: Odds Ratio; 95% CI: Confidence Interval; NG: Nagelkerke pseudo R<sup>2</sup>; LR: Likelihood Ratio; ICU: intensive care unit; AST: aspartate aminotransferase; Diabetes-1: diabetes mellitus type 1, including LADA; Diabetes-2: diabetes mellitus type 2 treated with oral medications; Diabetes-3: diabetes mellitus type 2 treated with insulin; Diabetes-4: prediabetes; COPD: chronic obstructive pulmonary disease; TIA: transient ischemic attack

Table S6. Model for GGT adjusted for comorbidities and potential risk factors, n=401.

|  | ICU admission | Mechanical ventilation | Fatal outcome |
|--|---------------|------------------------|---------------|
|--|---------------|------------------------|---------------|

|                                            | p-value<br>for<br>model |        |        |         |        |            |         | p-value<br>for<br>model |        |       |         |        |            |         | p-value<br>for<br>model |        |        |         |         |            |       |
|--------------------------------------------|-------------------------|--------|--------|---------|--------|------------|---------|-------------------------|--------|-------|---------|--------|------------|---------|-------------------------|--------|--------|---------|---------|------------|-------|
|                                            | OR                      | CI 95% |        | p-value | NG     | LR p-value |         | OR                      | CI 95% |       | p-value | NG     | LR p-value |         | OR                      | CI 95% |        | p-value | NG      | LR p-value |       |
|                                            |                         | 2.5%   | 97.5%  |         |        |            |         |                         | 2.5%   | 97.5% |         |        |            |         |                         | 2.5%   | 97.5%  |         |         |            |       |
| GGT                                        | 1.000                   | 0.999  | 1.000  | 0.735   | 0.0003 | 0.237      | <0.0001 | 1.000                   | 0.999  | 1.000 | 0.598   | 0.0001 | 0.241      | <0.0001 | 1.001                   | 1.000  | 1.000  | 0.220   | <0.0001 | 0.150      | 0.001 |
| Hypertension                               | 1.182                   | 0.718  | 1.950  | 0.512   |        |            |         | 1.460                   | 0.880  | 2.440 | 0.145   |        |            |         | 1.655                   | 0.994  | 2.790  | 0.055   |         |            |       |
| Diabetes -1                                | 0.236                   | 0.012  | 1.490  | 0.195   |        |            |         | 0.242                   | 0.012  | 1.550 | 0.205   |        |            |         | 0.611                   | 0.111  | 2.630  | 0.532   |         |            |       |
| Diabetes -2                                | 1.090                   | 0.571  | 2.060  | 0.791   |        |            |         | 1.105                   | 0.574  | 2.100 | 0.763   |        |            |         | 1.325                   | 0.723  | 2.400  | 0.357   |         |            |       |
| Diabetes -3                                | 1.203                   | 0.446  | 3.130  | 0.707   |        |            |         | 1.350                   | 0.494  | 3.590 | 0.549   |        |            |         | 0.893                   | 0.354  | 2.150  | 0.804   |         |            |       |
| Diabetes - 4                               | 1.365                   | 0.320  | 5.670  | 0.664   |        |            |         | 1.367                   | 0.317  | 5.750 | 0.665   |        |            |         | 2.613                   | 0.649  | 10.680 | 0.168   |         |            |       |
| Asthma                                     | 1.530                   | 0.462  | 4.970  | 0.474   |        |            |         | 1.129                   | 0.320  | 3.670 | 0.842   |        |            |         | 0.845                   | 0.184  | 2.870  | 0.804   |         |            |       |
| COPD                                       | <0.001                  | <0.001 | >1000  | 0.992   |        |            |         | <0.001                  | <0.001 | >1000 | 0.992   |        |            |         | 0.949                   | 0.223  | 3.520  | 0.939   |         |            |       |
| Dementia                                   | <0.001                  | <0.001 | >1000  | 0.988   |        |            |         | <0.001                  | <0.001 | >1000 | 0.988   |        |            |         | 3.393                   | 1.418  | 8.490  | 0.007   |         |            |       |
| Stroke/TIA in patient history              | 0.656                   | 0.252  | 1.570  | 0.362   |        |            |         | 0.738                   | 0.282  | 1.780 | 0.513   |        |            |         | 1.054                   | 0.480  | 2.250  | 0.894   |         |            |       |
| Chronic kidney disease                     | 0.335                   | 0.161  | 0.660  | 0.002   |        |            |         | 0.323                   | 0.152  | 0.640 | 0.002   |        |            |         | 0.765                   | 0.418  | 1.370  | 0.376   |         |            |       |
| Active smoker                              | 0.532                   | 0.131  | 1.840  | 0.338   |        |            |         | 0.394                   | 0.081  | 1.460 | 0.193   |        |            |         | 0.929                   | 0.303  | 2.650  | 0.893   |         |            |       |
| Former smoker                              | 0.405                   | 0.103  | 1.300  | 0.152   |        |            |         | 0.312                   | 0.067  | 1.070 | 0.091   |        |            |         | 0.727                   | 0.234  | 2.070  | 0.562   |         |            |       |
| Myocardial infraction in patient history   | 1.674                   | 0.778  | 3.610  | 0.186   |        |            |         | 1.568                   | 0.713  | 3.440 | 0.259   |        |            |         | 2.694                   | 1.384  | 5.320  | 0.004   |         |            |       |
| Heart failure                              | 0.827                   | 0.389  | 1.710  | 0.612   |        |            |         | 0.607                   | 0.275  | 1.280 | 0.202   |        |            |         | 1.434                   | 0.761  | 2.680  | 0.261   |         |            |       |
| Leukemia                                   | 2.935                   | 0.688  | 13.210 | 0.142   |        |            |         | 1.097                   | 0.203  | 4.820 | 0.906   |        |            |         | 4.514                   | 1.109  | 22.560 | 0.042   |         |            |       |
| Solid malignant disease without metastases | 0.757                   | 0.261  | 2.030  | 0.589   |        |            |         | 0.636                   | 0.208  | 1.740 | 0.396   |        |            |         | 1.535                   | 0.614  | 3.780  | 0.351   |         |            |       |
| Solid malignant disease with metastases    | <0.001                  | <0.001 | >1000  | 0.993   |        |            |         | <0.001                  | <0.001 | >1000 | 0.993   |        |            |         | 0.173                   | 0.009  | 1.040  | 0.110   |         |            |       |
| Lymphoma                                   | <0.001                  | <0.001 | >1000  | 0.992   |        |            |         | <0.001                  | <0.001 | >1000 | 0.992   |        |            |         | 0.597                   | 0.079  | 2.910  | 0.557   |         |            |       |
| Length of hospital stay                    | 1.020                   | 1.007  | 1.030  | 0.004   |        |            |         | 1.020                   | 1.006  | 1.030 | 0.005   |        |            |         | 0.993                   | 0.979  | 1.010  | 0.289   |         |            |       |

OR: Odds Ratio; 95% CI: Confidence Interval; NG: Nagelkerke pseudo R<sup>2</sup>; LR: Likelihood Ratio; ICU: intensive care unit; GGT: gamma-glutamyltransferase; Diabetes-1:diabetes mellitus type 1. including LADA; Diabetes-2: diabetes mellitus type 2 treated with oral medications; Diabetes-3: diabetes mellitus type 2 treated with insulin; Diabetes-4: prediabetes; COPD: chronic obstructive pulmonary disease; TIA: transient ischemic attack

Table S7. Model for albumin adjusted for comorbidities and potential risk factors, n=401.

|  | ICU admission | Mechanical ventilation | Fatal outcome |
|--|---------------|------------------------|---------------|
|--|---------------|------------------------|---------------|

|                                            | p-value<br>for model |        |        |         |        |            |         | p-value<br>for model |        |       |         |         |            |         | p-value<br>for model |        |        |         |         |            |         |
|--------------------------------------------|----------------------|--------|--------|---------|--------|------------|---------|----------------------|--------|-------|---------|---------|------------|---------|----------------------|--------|--------|---------|---------|------------|---------|
|                                            | OR                   | CI 95% |        | p-value | NG     | LR p-value |         | OR                   | CI 95% |       | p-value | NG      | LR p-value |         | OR                   | CI 95% |        | p-value | NG      | LR p-value |         |
|                                            |                      | 2.5%   | 97.5%  |         |        |            |         |                      | 2.5%   | 97.5% |         |         |            |         |                      | 2.5%   | 97.5%  |         |         |            |         |
| albumin                                    | 0.281                | 0.172  | 0.450  | <0.0001 | 0.0001 | 0.324      | <0.0001 | 0.247                | 0.148  | 0.400 | <0.0001 | <0.0001 | 0.341      | <0.0001 | 0.233                | 0.143  | 0.370  | <0.0001 | <0.0001 | 0.274      | <0.0001 |
| Hypertension                               | 1.113                | 0.659  | 1.890  | 0.689   |        |            |         | 1.435                | 0.838  | 2.480 | 0.191   |         |            |         | 1.551                | 0.908  | 2.680  | 0.111   |         |            |         |
| Diabetes -1                                | 0.202                | 0.010  | 1.280  | 0.149   |        |            |         | 0.202                | 0.010  | 1.300 | 0.152   |         |            |         | 0.601                | 0.116  | 2.470  | 0.502   |         |            |         |
| Diabetes -2                                | 1.077                | 0.546  | 2.100  | 0.829   |        |            |         | 1.081                | 0.542  | 2.130 | 0.824   |         |            |         | 1.290                | 0.673  | 2.450  | 0.437   |         |            |         |
| Diabetes -3                                | 1.251                | 0.449  | 3.370  | 0.661   |        |            |         | 1.413                | 0.496  | 3.940 | 0.509   |         |            |         | 0.944                | 0.356  | 2.370  | 0.905   |         |            |         |
| Diabetes - 4                               | 1.701                | 0.375  | 7.520  | 0.479   |        |            |         | 1.746                | 0.377  | 7.920 | 0.464   |         |            |         | 3.519                | 0.827  | 15.210 | 0.084   |         |            |         |
| Asthma                                     | 1.649                | 0.467  | 5.720  | 0.425   |        |            |         | 1.171                | 0.307  | 4.120 | 0.808   |         |            |         | 0.901                | 0.189  | 3.230  | 0.882   |         |            |         |
| COPD                                       | <0.001               | <0.001 | >1000  | 0.991   |        |            |         | <0.001               | <0.001 | >1000 | 0.991   |         |            |         | 0.707                | 0.147  | 2.870  | 0.639   |         |            |         |
| Dementia                                   | <0.001               | <0.001 | >1000  | 0.987   |        |            |         | <0.001               | <0.001 | >1000 | 0.987   |         |            |         | 1.946                | 0.748  | 5.200  | 0.175   |         |            |         |
| Stroke/TIA in patient history              | 0.646                | 0.242  | 1.600  | 0.359   |        |            |         | 0.701                | 0.258  | 1.770 | 0.465   |         |            |         | 1.188                | 0.532  | 2.600  | 0.668   |         |            |         |
| Chronic kidney disease                     | 0.264                | 0.124  | 0.530  | 0.000   |        |            |         | 0.244                | 0.112  | 0.500 | 0.000   |         |            |         | 0.575                | 0.300  | 1.070  | 0.087   |         |            |         |
| Active smoker                              | 0.666                | 0.153  | 2.510  | 0.562   |        |            |         | 0.484                | 0.095  | 1.950 | 0.333   |         |            |         | 1.541                | 0.445  | 4.960  | 0.478   |         |            |         |
| Former smoker                              | 0.424                | 0.103  | 1.440  | 0.194   |        |            |         | 0.310                | 0.062  | 1.160 | 0.107   |         |            |         | 0.779                | 0.229  | 2.430  | 0.676   |         |            |         |
| Myocardial infraction in patient history   | 1.565                | 0.706  | 3.450  | 0.266   |        |            |         | 1.436                | 0.632  | 3.230 | 0.382   |         |            |         | 2.670                | 1.326  | 5.470  | 0.006   |         |            |         |
| Heart failure                              | 0.879                | 0.402  | 1.870  | 0.740   |        |            |         | 0.621                | 0.270  | 1.360 | 0.246   |         |            |         | 1.769                | 0.903  | 3.450  | 0.094   |         |            |         |
| Leukemia                                   | 4.540                | 0.989  | 22.500 | 0.052   |        |            |         | 1.625                | 0.281  | 7.880 | 0.558   |         |            |         | 8.126                | 1.762  | 47.320 | 0.010   |         |            |         |
| Solid malignant disease without metastases | 0.589                | 0.193  | 1.660  | 0.330   |        |            |         | 0.474                | 0.143  | 1.400 | 0.194   |         |            |         | 1.255                | 0.478  | 3.240  | 0.638   |         |            |         |
| Solid malignant disease with metastases    | <0.001               | <0.001 | 0.993  | 0.993   |        |            |         | <0.001               | <0.001 | >1000 | 0.993   |         |            |         | 0.099                | 0.005  | 0.660  | 0.044   |         |            |         |
| Lymphoma                                   | <0.001               | <0.001 | >1000  | 0.992   |        |            |         | <0.001               | <0.001 | >1000 | 0.992   |         |            |         | 0.978                | 0.122  | 5.390  | 0.981   |         |            |         |
| Length of hospital stay                    | 1.013                | 0.998  | 1.030  | 0.089   |        |            |         | 1.012                | 0.997  | 1.030 | 0.118   |         |            |         | 0.983                | 0.968  | 1.000  | 0.030   |         |            |         |

OR: Odds Ratio; 95% CI: Confidence Interval; NG: Nagelkerke pseudo R<sup>2</sup>; LR: Likelihood Ratio; ICU: intensive care unit; Diabetes-1:diabetes mellitus type 1. including LADA; Diabetes-2: diabetes mellitus type 2 treated with oral medications; Diabetes-3: diabetes mellitus type 2 treated with insulin; Diabetes-4: prediabetes; COPD: chronic obstructive pulmonary disease; TIA: transient ischemic attack

Table S8. Model for ALP and albumin adjusted for comorbidities and potential risk factors, n=401.

| ICU admission        |        |         |    |            |  | Mechanical ventilation |        |         |    |            |  | Fatal outcome        |        |         |    |            |  |
|----------------------|--------|---------|----|------------|--|------------------------|--------|---------|----|------------|--|----------------------|--------|---------|----|------------|--|
| p-value<br>for model |        |         |    |            |  | p-value<br>for model   |        |         |    |            |  | p-value<br>for model |        |         |    |            |  |
| OR                   | CI 95% | p-value | NG | LR p-value |  | OR                     | CI 95% | p-value | NG | LR p-value |  | OR                   | CI 95% | p-value | NG | LR p-value |  |

|                                            | 2.5% 97.5% |        |        |        |         |       |         | 2.5% 97.5% |        |       |        |         |       |         | 2.5% 97.5% |       |        |        |         |       |         |
|--------------------------------------------|------------|--------|--------|--------|---------|-------|---------|------------|--------|-------|--------|---------|-------|---------|------------|-------|--------|--------|---------|-------|---------|
| ALP                                        | 0.998      | 0.995  | 1.000  | 0.199  | <0.0001 | 0.330 | <0.0001 | 0.998      | 0.995  | 1.000 | 0.227  | <0.0001 | 0.346 | <0.0001 | 1.001      | 0.999 | 1.000  | 0.255  | <0.0001 | 0.278 | <0.0001 |
| albumin                                    | 0.270      | 0.165  | 0.430  | <0.001 |         |       |         | 0.238      | 0.142  | 0.390 | <0.001 |         |       |         | 0.239      | 0.147 | 0.380  | <0.001 |         |       |         |
| Hyperte+A183+A189                          | 1.115      | 0.658  | 1.890  | 0.687  |         |       |         | 1.438      | 0.839  | 2.490 | 0.189  |         |       |         | 1.534      | 0.896 | 2.650  | 0.121  |         |       |         |
| Diabetes -1                                | 0.244      | 0.012  | 1.640  | 0.212  |         |       |         | 0.249      | 0.012  | 1.700 | 0.220  |         |       |         | 0.500      | 0.091 | 2.150  | 0.376  |         |       |         |
| Diabetes -2                                | 1.065      | 0.538  | 2.090  | 0.855  |         |       |         | 1.070      | 0.535  | 2.120 | 0.847  |         |       |         | 1.306      | 0.680 | 2.480  | 0.417  |         |       |         |
| Diabetes -3                                | 1.233      | 0.441  | 3.330  | 0.682  |         |       |         | 1.398      | 0.489  | 3.910 | 0.523  |         |       |         | 0.964      | 0.364 | 2.420  | 0.939  |         |       |         |
| Diabetes - 4                               | 1.671      | 0.369  | 7.380  | 0.493  |         |       |         | 1.716      | 0.371  | 7.780 | 0.478  |         |       |         | 3.559      | 0.835 | 15.400 | 0.081  |         |       |         |
| Asthma                                     | 1.767      | 0.494  | 6.220  | 0.369  |         |       |         | 1.236      | 0.320  | 4.420 | 0.747  |         |       |         | 0.880      | 0.185 | 3.150  | 0.855  |         |       |         |
| COPD                                       | <0.001     | <0.001 | >1000  | 0.991  |         |       |         | <0.001     | <0.001 | >1000 | 0.991  |         |       |         | 0.707      | 0.149 | 2.860  | 0.638  |         |       |         |
| Dementia                                   | <0.001     | <0.001 | >1000  | 0.987  |         |       |         | <0.001     | <0.001 | >1000 | 0.987  |         |       |         | 1.992      | 0.765 | 5.320  | 0.160  |         |       |         |
| Stroke/TIA in patient history              | 0.631      | 0.236  | 1.560  | 0.335  |         |       |         | 0.686      | 0.252  | 1.730 | 0.438  |         |       |         | 1.222      | 0.548 | 2.680  | 0.618  |         |       |         |
| Chronic kiedney disease                    | 0.262      | 0.122  | 0.530  | <0.001 |         |       |         | 0.241      | 0.110  | 0.500 | <0.001 |         |       |         | 0.575      | 0.300 | 1.070  | 0.088  |         |       |         |
| Active smoker                              | 0.645      | 0.148  | 2.430  | 0.530  |         |       |         | 0.469      | 0.092  | 1.880 | 0.312  |         |       |         | 1.565      | 0.450 | 5.050  | 0.463  |         |       |         |
| Former smoker                              | 0.428      | 0.104  | 1.450  | 0.198  |         |       |         | 0.315      | 0.063  | 1.170 | 0.111  |         |       |         | 0.777      | 0.227 | 2.440  | 0.674  |         |       |         |
| Myocardial infraction in patient history   | 1.531      | 0.688  | 3.390  | 0.293  |         |       |         | 1.396      | 0.612  | 3.150 | 0.422  |         |       |         | 2.753      | 1.363 | 5.650  | 0.005  |         |       |         |
| Heart failure                              | 0.889      | 0.405  | 1.900  | 0.765  |         |       |         | 0.626      | 0.271  | 1.380 | 0.255  |         |       |         | 1.747      | 0.892 | 3.410  | 0.102  |         |       |         |
| Leukemia                                   | 4.642      | 1.016  | 22.970 | 0.048  |         |       |         | 1.675      | 0.291  | 8.070 | 0.531  |         |       |         | 8.072      | 1.734 | 47.240 | 0.011  |         |       |         |
| Solid malignant disease without metastases | 0.664      | 0.213  | 1.920  | 0.460  |         |       |         | 0.539      | 0.160  | 1.630 | 0.290  |         |       |         | 1.168      | 0.436 | 3.060  | 0.753  |         |       |         |
| Solid malignant disease with metastases    | <0.001     | <0.001 | 0.993  | 0.993  |         |       |         | <0.001     | <0.001 | >1000 | 0.993  |         |       |         | 0.076      | 0.003 | 0.560  | 0.032  |         |       |         |
| Lymphoma                                   | <0.001     | <0.001 | >1000  | 0.992  |         |       |         | <0.001     | <0.001 | >1000 | 0.992  |         |       |         | 1.004      | 0.126 | 5.530  | 0.997  |         |       |         |
| Lenght of hospital stay                    | 1.014      | 0.999  | 1.030  | 0.074  |         |       |         | 1.013      | 0.998  | 1.030 | 0.101  |         |       |         | 0.983      | 0.967 | 1.000  | 0.027  |         |       |         |

OR: Odds Ratio; 95% CI: Confidence Interval; NG: Nagelkerke pseudo R2; LR: Likelihood Ratio; ICU: intensive care unit; ALP:alkaline phosphatase; Diabetes-1:diabetes mellitus type 1. including LADA; Diabates-2: diabetes mellitus type 2 treated with oral medications; Diabetes-3: diabetes mellitus type 2 treated with insulin; Diabtes-4: prediabetes; COPD: chronic obstructive pulmonary disease; TIA: transient ischemic attack

Table S9. Model for TBIL and albumin adjusted for comorbidities and potential risk factors, n=401.

| ICU admission |        |         |    |            |  | Mechanical ventilation |        |         |    |            |  | Fatal outcome |        |         |    |            |  |
|---------------|--------|---------|----|------------|--|------------------------|--------|---------|----|------------|--|---------------|--------|---------|----|------------|--|
| p-value       |        |         |    |            |  | p-value                |        |         |    |            |  | p-value       |        |         |    |            |  |
| for           |        |         |    |            |  | for                    |        |         |    |            |  | for           |        |         |    |            |  |
| model         |        |         |    |            |  | model                  |        |         |    |            |  | model         |        |         |    |            |  |
| OR            | CI 95% | p-value | NG | LR p-value |  | OR                     | CI 95% | p-value | NG | LR p-value |  | OR            | CI 95% | p-value | NG | LR p-value |  |
| 2.5%          | 97.5%  |         |    |            |  | 2.5%                   | 97.5%  |         |    |            |  | 2.5%          | 97.5%  |         |    |            |  |



|                                            |        |        |        |        |        |       |         |        |        |       |        |         |       |         |       |       |        |        |        |       |         |
|--------------------------------------------|--------|--------|--------|--------|--------|-------|---------|--------|--------|-------|--------|---------|-------|---------|-------|-------|--------|--------|--------|-------|---------|
| TBIL                                       | 0.930  | 0.669  | 1.240  | 0.627  | 0.0001 | 0.325 | <0.0001 | 0.941  | 0.678  | 1.260 | 0.686  | <0.0001 | 0.341 | <0.0001 | 1.705 | 1.229 | 2.470  | 0.003  | 0.0001 | 0.304 | <0.0001 |
| albumin                                    | 0.279  | 0.170  | 0.440  | <0.001 |        |       |         | 0.246  | 0.147  | 0.400 | <0.001 |         |       |         | 0.228 | 0.139 | 0.360  | <0.001 |        |       |         |
| Hypertension                               | 1.115  | 0.660  | 1.890  | 0.685  |        |       |         | 1.438  | 0.839  | 2.480 | 0.189  |         |       |         | 1.670 | 0.966 | 2.920  | 0.069  |        |       |         |
| Diabetes -1                                | 0.201  | 0.010  | 1.280  | 0.149  |        |       |         | 0.202  | 0.010  | 1.300 | 0.152  |         |       |         | 0.666 | 0.128 | 2.780  | 0.593  |        |       |         |
| Diabetes -2                                | 1.059  | 0.535  | 2.080  | 0.867  |        |       |         | 1.065  | 0.533  | 2.110 | 0.856  |         |       |         | 1.437 | 0.745 | 2.750  | 0.275  |        |       |         |
| Diabetes -3                                | 1.240  | 0.444  | 3.350  | 0.674  |        |       |         | 1.404  | 0.491  | 3.920 | 0.518  |         |       |         | 0.955 | 0.361 | 2.400  | 0.924  |        |       |         |
| Diabetes - 4                               | 1.679  | 0.370  | 7.430  | 0.490  |        |       |         | 1.728  | 0.373  | 7.850 | 0.473  |         |       |         | 3.849 | 0.911 | 16.390 | 0.062  |        |       |         |
| Asthma                                     | 1.613  | 0.455  | 5.610  | 0.447  |        |       |         | 1.149  | 0.300  | 4.060 | 0.831  |         |       |         | 1.032 | 0.215 | 3.750  | 0.964  |        |       |         |
| COPD                                       | <0.001 | <0.001 | >1000  | 0.991  |        |       |         | <0.001 | <0.001 | >1000 | 0.991  |         |       |         | 0.554 | 0.110 | 2.370  | 0.443  |        |       |         |
| Dementia                                   | <0.001 | <0.001 | >1000  | 0.987  |        |       |         | <0.001 | <0.001 | >1000 | 0.987  |         |       |         | 2.024 | 0.768 | 5.490  | 0.156  |        |       |         |
| Stroke/TIA in patient history              | 0.643  | 0.241  | 1.590  | 0.355  |        |       |         | 0.698  | 0.257  | 1.760 | 0.460  |         |       |         | 1.191 | 0.532 | 2.610  | 0.665  |        |       |         |
| Chronic kidney disease                     | 0.260  | 0.121  | 0.530  | <0.001 |        |       |         | 0.240  | 0.109  | 0.500 | <0.001 |         |       |         | 0.607 | 0.315 | 1.140  | 0.126  |        |       |         |
| Active smoker                              | 0.654  | 0.149  | 2.480  | 0.546  |        |       |         | 0.475  | 0.092  | 1.920 | 0.322  |         |       |         | 1.504 | 0.435 | 4.840  | 0.503  |        |       |         |
| Former smoker                              | 0.425  | 0.103  | 1.440  | 0.195  |        |       |         | 0.311  | 0.062  | 1.160 | 0.108  |         |       |         | 0.767 | 0.218 | 2.470  | 0.665  |        |       |         |
| Myocardial infraction in patient history   | 1.553  | 0.700  | 3.430  | 0.275  |        |       |         | 1.426  | 0.627  | 3.210 | 0.391  |         |       |         | 2.785 | 1.373 | 5.750  | 0.005  |        |       |         |
| Heart failure                              | 0.890  | 0.406  | 1.900  | 0.766  |        |       |         | 0.626  | 0.272  | 1.380 | 0.255  |         |       |         | 1.509 | 0.767 | 2.950  | 0.230  |        |       |         |
| Leukemia                                   | 4.483  | 0.976  | 22.270 | 0.054  |        |       |         | 1.612  | 0.280  | 7.820 | 0.564  |         |       |         | 9.132 | 1.976 | 52.840 | 0.007  |        |       |         |
| Solid malignant disease without metastases | 0.610  | 0.198  | 1.740  | 0.368  |        |       |         | 0.491  | 0.147  | 1.460 | 0.219  |         |       |         | 1.158 | 0.418 | 3.130  | 0.773  |        |       |         |
| Solid malignant disease with metastases    | <0.001 | <0.001 | 0.993  | 0.993  |        |       |         | <0.001 | <0.001 | >1000 | 0.993  |         |       |         | 0.048 | 0.002 | 0.390  | 0.015  |        |       |         |
| Lymphoma                                   | <0.001 | <0.001 | >1000  | 0.992  |        |       |         | <0.001 | <0.001 | >1000 | 0.992  |         |       |         | 1.047 | 0.124 | 6.140  | 0.962  |        |       |         |
| Length of hospital stay                    | 1.013  | 0.998  | 1.030  | 0.089  |        |       |         | 1.012  | 0.997  | 1.030 | 0.118  |         |       |         | 0.983 | 0.968 | 1.000  | 0.028  |        |       |         |

OR: Odds Ratio; 95% CI: Confidence Interval; NG: Nagelkerke pseudo R<sup>2</sup>; LR: Likelihood Ratio; ICU: intensive care unit; TBIL: total bilirubin; Diabetes-1:diabetes mellitus type 1. including LADA; Diabetes-2: diabetes mellitus type 2 treated with oral medications; Diabetes-3: diabetes mellitus type 2 treated with insulin; Diabetes-4: prediabetes; COPD: chronic obstructive pulmonary disease; TIA: transient ischemic attack

Table S10. Model for ALT and albumin adjusted for comorbidities and potential risk factors, n=401.

|         | ICU admission |        |         |                   |        |            |         | Mechanical ventilation |        |         |                   |         |            |         | Fatal outcome |        |         |                   |         |            |         |
|---------|---------------|--------|---------|-------------------|--------|------------|---------|------------------------|--------|---------|-------------------|---------|------------|---------|---------------|--------|---------|-------------------|---------|------------|---------|
|         |               |        |         | p-value for model |        |            |         |                        |        |         | p-value for model |         |            |         |               |        |         | p-value for model |         |            |         |
|         | OR            | CI 95% | p-value | model             | NG     | LR p-value |         | OR                     | CI 95% | p-value | model             | NG      | LR p-value |         | OR            | CI 95% | p-value | model             | NG      | LR p-value |         |
|         |               | 2.5%   | 97.5%   |                   |        |            |         |                        | 2.5%   | 97.5%   |                   |         |            |         |               | 2.5%   | 97.5%   |                   |         |            |         |
| albumin | 0.279         | 0.171  | 0.440   | <0.0001           | 0.0001 | 0.326      | <0.0001 | 0.245                  | 0.147  | 0.400   | <0.0001           | <0.0001 | 0.343      | <0.0001 | 0.227         | 0.139  | 0.360   | <0.0001           | <0.0001 | 0.285      | <0.0001 |

|                                            |        |        |        |       |        |        |       |       |       |       |        |       |
|--------------------------------------------|--------|--------|--------|-------|--------|--------|-------|-------|-------|-------|--------|-------|
| ALT                                        | 1.000  | 0.998  | 1.000  | 0.480 | 1.000  | 0.999  | 1.000 | 0.361 | 1.002 | 1.000 | 1.000  | 0.086 |
| Hypertension                               | 1.140  | 0.670  | 1.930  | 0.637 | 1.470  | 0.857  | 2.560 | 0.163 | 1.623 | 0.944 | 2.820  | 0.082 |
| Diabetes -1                                | 0.205  | 0.011  | 1.300  | 0.153 | 0.207  | 0.011  | 1.330 | 0.158 | 0.605 | 0.116 | 2.500  | 0.509 |
| Diabetes -2                                | 1.090  | 0.550  | 2.120  | 0.811 | 1.090  | 0.547  | 2.160 | 0.801 | 1.322 | 0.688 | 2.520  | 0.397 |
| Diabetes -3                                | 1.230  | 0.440  | 3.320  | 0.688 | 1.380  | 0.484  | 3.850 | 0.538 | 0.914 | 0.345 | 2.300  | 0.852 |
| Diabetes - 4                               | 1.720  | 0.380  | 7.640  | 0.467 | 1.780  | 0.384  | 8.090 | 0.450 | 3.673 | 0.857 | 15.990 | 0.075 |
| Asthma                                     | 1.500  | 0.411  | 5.360  | 0.526 | 1.030  | 0.259  | 3.750 | 0.962 | 0.747 | 0.149 | 2.770  | 0.687 |
| COPD                                       | <0.001 | <0.001 | >1000  | 0.991 | <0.001 | <0.001 | >1000 | 0.991 | 0.731 | 0.153 | 2.970  | 0.673 |
| Dementia                                   | <0.001 | <0.001 | >1000  | 0.986 | <0.001 | <0.001 | >1000 | 0.985 | 1.767 | 0.656 | 4.850  | 0.261 |
| Stroke/TIA in patient history              | 0.661  | 0.247  | 1.630  | 0.385 | 0.722  | 0.266  | 1.820 | 0.504 | 1.247 | 0.557 | 2.740  | 0.584 |
| Chronic kidney disease                     | 0.269  | 0.126  | 0.540  | 0.000 | 0.249  | 0.114  | 0.510 | 0.000 | 0.593 | 0.309 | 1.110  | 0.107 |
| Active smoker                              | 0.671  | 0.154  | 2.530  | 0.569 | 0.489  | 0.096  | 1.970 | 0.341 | 1.545 | 0.435 | 5.030  | 0.482 |
| Former smoker                              | 0.430  | 0.104  | 1.460  | 0.201 | 0.316  | 0.063  | 1.180 | 0.113 | 0.794 | 0.231 | 2.490  | 0.701 |
| Myocardial infraction in patient history   | 1.590  | 0.715  | 3.510  | 0.253 | 1.460  | 0.642  | 3.290 | 0.360 | 2.781 | 1.376 | 5.710  | 0.005 |
| Heart failure                              | 0.871  | 0.398  | 1.850  | 0.724 | 0.614  | 0.267  | 1.350 | 0.235 | 1.761 | 0.899 | 3.440  | 0.097 |
| Leukemia                                   | 4.590  | 0.999  | 22.770 | 0.050 | 1.650  | 0.285  | 8.020 | 0.546 | 8.544 | 1.831 | 50.380 | 0.009 |
| Solid malignant disease without metastases | 0.595  | 0.195  | 1.680  | 0.339 | 0.479  | 0.145  | 1.420 | 0.200 | 1.288 | 0.490 | 3.340  | 0.602 |
| Solid malignant disease with metastases    | <0.001 | <0.001 | >1000  | 0.993 | <0.001 | <0.001 | >1000 | 0.993 | 0.089 | 0.004 | 0.600  | 0.034 |
| Lymphoma                                   | <0.001 | <0.001 | >1000  | 0.992 | <0.001 | <0.001 | >1000 | 0.992 | 1.076 | 0.134 | 5.980  | 0.937 |
| Length of hospital stay                    | 1.010  | 0.998  | 1.030  | 0.089 | 1.010  | 0.997  | 1.030 | 0.117 | 0.984 | 0.968 | 1.000  | 0.037 |

OR: Odds Ratio; 95% CI: Confidence Interval; NG: Nagelkerke pseudo R<sup>2</sup>; LR: Likelihood Ratio; ICU: intensive care unit; ALT:alanine aminotransferase; Diabetes-1:diabetes mellitus type 1. including LADA; Diabetes-2: diabetes mellitus type 2 treated with oral medications; Diabetes-3: diabetes mellitus type 2 treated with insulin; Diabetes-4: prediabetes; COPD: chronic obstructive pulmonary disease; TIA: transient ischemic attack

Table S11. Model for AST and albumin adjusted for comorbidities and potential risk factors, n=401.

|         | ICU admission |        |         |           |         |            |         | Mechanical ventilation |        |         |           |         |            |         | Fatal outcome |        |         |           |         |            |         |
|---------|---------------|--------|---------|-----------|---------|------------|---------|------------------------|--------|---------|-----------|---------|------------|---------|---------------|--------|---------|-----------|---------|------------|---------|
|         |               |        |         | p-value   |         |            |         |                        |        |         | p-value   |         |            |         |               |        |         | p-value   |         |            |         |
|         | OR            | CI 95% | p-value | for model | NG      | LR p-value |         | OR                     | CI 95% | p-value | for model | NG      | LR p-value |         | OR            | CI 95% | p-value | for model | NG      | LR p-value |         |
|         | 2.5%          | 97.5%  |         |           |         |            |         | 2.5%                   | 97.5%  |         |           |         |            |         | 2.5%          | 97.5%  |         |           |         |            |         |
| albumin | 0.281         | 0.172  | 0.450   | <0.0001   | <0.0001 | 0.324      | <0.0001 | 0.248                  | 0.149  | 0.400   | <0.0001   | <0.0001 | 0.342      | <0.0001 | 0.233         | 0.142  | 0.370   | <0.0001   | <0.0001 | 0.300      | <0.0001 |
| AST     | 1.000         | 0.998  | 1.000   | 0.790     |         |            |         | 1.000                  | 0.999  | 1.000   | 0.429     |         |            |         | 1.003         | 1.001  | 1.010   | 0.009     |         |            |         |

|                                            |        |        |        |        |        |        |       |        |       |       |        |       |
|--------------------------------------------|--------|--------|--------|--------|--------|--------|-------|--------|-------|-------|--------|-------|
| Hypertension                               | 1.120  | 0.661  | 1.900  | 0.675  | 1.460  | 0.850  | 2.530 | 0.173  | 1.666 | 0.966 | 2.910  | 0.069 |
| Diabetes -1                                | 0.203  | 0.010  | 1.280  | 0.151  | 0.205  | 0.011  | 1.320 | 0.156  | 0.605 | 0.116 | 2.500  | 0.508 |
| Diabetes -2                                | 1.080  | 0.547  | 2.110  | 0.825  | 1.090  | 0.545  | 2.150 | 0.811  | 1.330 | 0.689 | 2.540  | 0.390 |
| Diabetes -3                                | 1.240  | 0.441  | 3.350  | 0.680  | 1.360  | 0.476  | 3.810 | 0.556  | 0.804 | 0.294 | 2.060  | 0.657 |
| Diabetes - 4                               | 1.710  | 0.376  | 7.550  | 0.475  | 1.770  | 0.382  | 8.050 | 0.453  | 3.729 | 0.863 | 16.360 | 0.074 |
| Asthma                                     | 1.610  | 0.451  | 5.650  | 0.450  | 1.090  | 0.281  | 3.900 | 0.894  | 0.688 | 0.125 | 2.660  | 0.620 |
| COPD                                       | <0.001 | <0.001 | >1000  | 0.991  | <0.001 | <0.001 | >1000 | 0.991  | 0.731 | 0.152 | 2.990  | 0.674 |
| Dementia                                   | <0.001 | <0.001 | >1000  | 0.987  | <0.001 | <0.001 | >1000 | 0.985  | 1.742 | 0.639 | 4.820  | 0.278 |
| Stroke/TIA in patient history              | 0.647  | 0.242  | 1.600  | 0.360  | 0.703  | 0.259  | 1.770 | 0.468  | 1.218 | 0.539 | 2.690  | 0.628 |
| Chronic kidney disease                     | 0.268  | 0.125  | 0.550  | <0.001 | 0.254  | 0.116  | 0.530 | <0.001 | 0.650 | 0.337 | 1.220  | 0.190 |
| Active smoker                              | 0.672  | 0.154  | 2.530  | 0.571  | 0.498  | 0.097  | 2.010 | 0.354  | 1.587 | 0.443 | 5.180  | 0.457 |
| Former smoker                              | 0.425  | 0.103  | 1.440  | 0.196  | 0.312  | 0.062  | 1.170 | 0.110  | 0.810 | 0.232 | 2.580  | 0.729 |
| Myocardial infraction in patient history   | 1.570  | 0.709  | 3.480  | 0.261  | 1.460  | 0.643  | 3.290 | 0.360  | 2.836 | 1.402 | 5.840  | 0.004 |
| Heart failure                              | 0.874  | 0.399  | 1.860  | 0.731  | 0.611  | 0.265  | 1.340 | 0.231  | 1.697 | 0.861 | 3.330  | 0.124 |
| Leukemia                                   | 4.570  | 0.994  | 22.660 | 0.051  | 1.660  | 0.287  | 8.060 | 0.541  | 9.052 | 1.927 | 53.920 | 0.008 |
| Solid malignant disease without metastases | 0.586  | 0.191  | 1.660  | 0.325  | 0.463  | 0.139  | 1.380 | 0.182  | 1.233 | 0.459 | 3.250  | 0.672 |
| Solid malignant disease with metastases    | <0.001 | <0.001 | >1000  | 0.993  | <0.001 | <0.001 | >1000 | 0.993  | 0.095 | 0.005 | 0.640  | 0.041 |
| Lymphoma                                   | <0.001 | <0.001 | >1000  | 0.992  | <0.001 | <0.001 | >1000 | 0.992  | 1.144 | 0.143 | 6.380  | 0.885 |
| Length of hospital stay                    | 1.010  | 0.998  | 1.030  | 0.089  | 1.010  | 0.997  | 1.030 | 0.118  | 0.984 | 0.968 | 1.000  | 0.040 |

OR: Odds Ratio; 95% CI: Confidence Interval; NG: Nagelkerke pseudo R<sup>2</sup>; LR: Likelihood Ratio; ICU: intensive care unit; AST: aspartate aminotransferase; Diabetes-1: diabetes mellitus type 1. including LADA; Diabetes-2: diabetes mellitus type 2 treated with oral medications; Diabetes-3: diabetes mellitus type 2 treated with insulin; Diabetes-4: prediabetes; COPD: chronic obstructive pulmonary disease; TIA: transient ischemic attack

Table S12. Model for GGT and TBIL adjusted for comorbidities and potential risk factors, n=401.

|              | ICU admission |        |         |         |       |            |         | Mechanical ventilation |        |         |         |       |            |         | Fatal outcome |        |         |         |         |            |         |
|--------------|---------------|--------|---------|---------|-------|------------|---------|------------------------|--------|---------|---------|-------|------------|---------|---------------|--------|---------|---------|---------|------------|---------|
|              |               |        |         | p-value |       | LR p-value |         |                        |        |         | p-value |       | LR p-value |         |               |        |         | p-value |         | LR p-value |         |
|              | OR            | CI 95% | p-value | model   | NG    | p-value    |         | OR                     | CI 95% | p-value | model   | NG    | p-value    |         | OR            | CI 95% | p-value | model   | NG      | p-value    |         |
|              |               | 2.5%   | 97.5%   |         |       |            |         |                        | 2.5%   | 97.5%   |         |       |            |         |               | 2.5%   | 97.5%   |         |         |            |         |
| GGT          | 1.001         | 0.999  | 1.000   | 0.467   | 0.002 | 0.238      | <0.0001 | 1.001                  | 0.999  | 1.000   | 0.392   | 0.001 | 0.243      | <0.0001 | 0.999         | 0.997  | 1.000   | 0.151   | <0.0001 | 0.184      | <0.0001 |
| TBIL         | 0.868         | 0.553  | 1.280   | 0.500   |       |            |         | 0.867                  | 0.550  | 1.290   | 0.503   |       |            |         | 1.969         | 1.303  | 3.080   | 0.002   |         |            |         |
| Hypertension | 1.191         | 0.724  | 1.970   | 0.493   |       |            |         | 1.474                  | 0.887  | 2.470   | 0.137   |       |            |         | 1.700         | 1.013  | 2.880   | 0.046   |         |            |         |

|                                            |        |        |        |       |        |        |       |       |       |       |        |       |
|--------------------------------------------|--------|--------|--------|-------|--------|--------|-------|-------|-------|-------|--------|-------|
| Diabetes -1                                | 0.229  | 0.012  | 1.450  | 0.186 | 0.235  | 0.012  | 1.500 | 0.196 | 0.818 | 0.150 | 3.540  | 0.799 |
| Diabetes -2                                | 1.053  | 0.548  | 2.000  | 0.876 | 1.067  | 0.551  | 2.050 | 0.845 | 1.558 | 0.839 | 2.870  | 0.157 |
| Diabetes -3                                | 1.173  | 0.434  | 3.060  | 0.746 | 1.316  | 0.479  | 3.510 | 0.586 | 0.987 | 0.387 | 2.400  | 0.977 |
| Diabetes - 4                               | 1.333  | 0.312  | 5.550  | 0.689 | 1.338  | 0.310  | 5.640 | 0.688 | 2.899 | 0.715 | 11.870 | 0.128 |
| Asthma                                     | 1.444  | 0.431  | 4.740  | 0.540 | 1.068  | 0.300  | 3.510 | 0.915 | 1.030 | 0.221 | 3.580  | 0.965 |
| COPD                                       | <0.001 | <0.001 | >1000  | 0.992 | <0.001 | <0.001 | >1000 | 0.992 | 0.743 | 0.159 | 2.930  | 0.682 |
| Dementia                                   | <0.001 | <0.001 | >1000  | 0.988 | <0.001 | <0.001 | >1000 | 0.988 | 3.329 | 1.374 | 8.450  | 0.009 |
| Stroke/TIA in patient history              | 0.675  | 0.258  | 1.620  | 0.396 | 0.758  | 0.289  | 1.840 | 0.552 | 0.934 | 0.420 | 2.020  | 0.865 |
| Chronic kidney disease                     | 0.330  | 0.158  | 0.650  | 0.002 | 0.318  | 0.149  | 0.640 | 0.002 | 0.790 | 0.429 | 1.430  | 0.442 |
| Active smoker                              | 0.509  | 0.124  | 1.770  | 0.308 | 0.376  | 0.077  | 1.400 | 0.174 | 0.988 | 0.316 | 2.870  | 0.983 |
| Former smoker                              | 0.396  | 0.101  | 1.270  | 0.144 | 0.306  | 0.065  | 1.060 | 0.086 | 0.753 | 0.236 | 2.200  | 0.615 |
| Myocardial infraction in patient history   | 1.680  | 0.780  | 3.620  | 0.183 | 1.574  | 0.715  | 3.450 | 0.255 | 2.671 | 1.358 | 5.330  | 0.005 |
| Heart failure                              | 0.852  | 0.399  | 1.770  | 0.671 | 0.624  | 0.281  | 1.330 | 0.231 | 1.186 | 0.618 | 2.250  | 0.605 |
| Leukemia                                   | 2.885  | 0.676  | 13.010 | 0.149 | 1.081  | 0.201  | 4.740 | 0.921 | 5.019 | 1.224 | 25.180 | 0.030 |
| Solid malignant disease without metastases | 0.788  | 0.270  | 2.140  | 0.647 | 0.663  | 0.215  | 1.830 | 0.446 | 1.387 | 0.530 | 3.540  | 0.495 |
| Solid malignant disease with metastases    | <0.001 | <0.001 | >1000  | 0.993 | <0.001 | <0.001 | >1000 | 0.993 | 0.082 | 0.003 | 0.640  | 0.049 |
| Lymphoma                                   | <0.001 | <0.001 | >1000  | 0.992 | <0.001 | <0.001 | >1000 | 0.992 | 0.578 | 0.071 | 2.990  | 0.551 |
| Length of hospital stay                    | 1.021  | 1.007  | 1.040  | 0.004 | 1.020  | 1.007  | 1.030 | 0.004 | 0.992 | 0.978 | 1.010  | 0.237 |

OR: Odds Ratio; 95% CI: Confidence Interval; NG: Nagelkerke pseudo R<sup>2</sup>; LR: Likelihood Ratio; ICU: intensive care unit; TBIL: total bilirubin; GGT: gamma-glutamyltransferase; Diabetes-1:diabetes mellitus type 1. including LADA; Diabetes-2: diabetes mellitus type 2 treated with oral medications; Diabetes-3: diabetes mellitus type 2 treated with insulin; Diabetes-4: prediabetes; COPD: chronic obstructive pulmonary disease; TIA: transient ischemic attack

Table S13. Model for GGT and ALP adjusted for comorbidities and potential risk factors, n=401.

|              | ICU admission |        |         |         |       |       |         | Mechanical ventilation |        |         |         |        |       |         | Fatal outcome |        |         |         |         |       |         |
|--------------|---------------|--------|---------|---------|-------|-------|---------|------------------------|--------|---------|---------|--------|-------|---------|---------------|--------|---------|---------|---------|-------|---------|
|              |               |        |         | p-value |       |       |         |                        |        |         | p-value |        |       |         |               |        |         | p-value |         |       |         |
|              | OR            | CI 95% | p-value | model   | NG    | LR    | p-value | OR                     | CI 95% | p-value | model   | NG     | LR    | p-value | OR            | CI 95% | p-value | model   | NG      | LR    | p-value |
|              |               | 2.5%   | 97.5%   |         |       |       |         |                        | 2.5%   | 97.5%   |         |        |       |         |               | 2.5%   | 97.5%   |         |         |       |         |
| GGT          | 1.001         | 0.999  | 1.000   | 0.336   | 0.001 | 0.242 | <0.0001 | 1.001                  | 0.999  | 1.000   | 0.282   | 0.0004 | 0.246 | <0.0001 | 1.000         | 0.999  | 1.000   | 0.706   | <0.0001 | 0.156 | 0.001   |
| ALP          | 0.998         | 0.994  | 1.000   | 0.253   |       |       |         | 0.998                  | 0.995  | 1.000   | 0.271   |        |       |         | 1.002         | 0.999  | 1.000   | 0.178   |         |       |         |
| Hypertension | 1.196         | 0.726  | 1.980   | 0.484   |       |       |         | 1.475                  | 0.888  | 2.470   | 0.136   |        |       |         | 1.616         | 0.967  | 2.730   | 0.069   |         |       |         |
| Diabetes -1  | 0.271         | 0.014  | 1.780   | 0.247   |       |       |         | 0.282                  | 0.014  | 1.870   | 0.263   |        |       |         | 0.494         | 0.086  | 2.200   | 0.383   |         |       |         |

|                                            |        |        |        |       |        |        |       |       |       |       |        |       |
|--------------------------------------------|--------|--------|--------|-------|--------|--------|-------|-------|-------|-------|--------|-------|
| Diabetes -2                                | 1.072  | 0.561  | 2.030  | 0.832 | 1.088  | 0.565  | 2.070 | 0.799 | 1.344 | 0.732 | 2.440  | 0.335 |
| Diabetes -3                                | 1.168  | 0.432  | 3.040  | 0.753 | 1.310  | 0.477  | 3.490 | 0.591 | 0.928 | 0.367 | 2.240  | 0.871 |
| Diabetes - 4                               | 1.338  | 0.313  | 5.560  | 0.685 | 1.343  | 0.311  | 5.650 | 0.684 | 2.651 | 0.657 | 10.850 | 0.162 |
| Asthma                                     | 1.603  | 0.483  | 5.210  | 0.428 | 1.182  | 0.335  | 3.850 | 0.783 | 0.821 | 0.179 | 2.790  | 0.770 |
| COPD                                       | <0.001 | <0.001 | >1000  | 0.992 | <0.001 | <0.001 | >1000 | 0.992 | 0.941 | 0.221 | 3.500  | 0.929 |
| Dementia                                   | <0.001 | <0.001 | >1000  | 0.988 | <0.001 | <0.001 | >1000 | 0.988 | 3.398 | 1.420 | 8.490  | 0.007 |
| Stroke/TIA in patient history              | 0.664  | 0.254  | 1.600  | 0.376 | 0.746  | 0.285  | 1.810 | 0.529 | 1.068 | 0.487 | 2.280  | 0.867 |
| Chronic kidney disease                     | 0.339  | 0.163  | 0.670  | 0.003 | 0.327  | 0.154  | 0.650 | 0.002 | 0.756 | 0.412 | 1.360  | 0.355 |
| Active smoker                              | 0.499  | 0.122  | 1.730  | 0.293 | 0.371  | 0.076  | 1.380 | 0.167 | 0.970 | 0.314 | 2.790  | 0.955 |
| Former smoker                              | 0.393  | 0.100  | 1.260  | 0.140 | 0.305  | 0.065  | 1.050 | 0.085 | 0.738 | 0.236 | 2.110  | 0.582 |
| Myocardial infraction in patient history   | 1.686  | 0.781  | 3.650  | 0.182 | 1.571  | 0.712  | 3.450 | 0.259 | 2.744 | 1.407 | 5.430  | 0.003 |
| Heart failure                              | 0.833  | 0.392  | 1.720  | 0.626 | 0.612  | 0.277  | 1.290 | 0.210 | 1.424 | 0.755 | 2.670  | 0.271 |
| Leukemia                                   | 3.032  | 0.706  | 13.710 | 0.132 | 1.119  | 0.205  | 4.950 | 0.886 | 4.423 | 1.085 | 22.150 | 0.045 |
| Solid malignant disease without metastases | 0.842  | 0.286  | 2.310  | 0.744 | 0.710  | 0.229  | 1.980 | 0.528 | 1.413 | 0.552 | 3.530  | 0.461 |
| Solid malignant disease with metastases    | <0.001 | <0.001 | >1000  | 0.993 | <0.001 | <0.001 | >1000 | 0.993 | 0.134 | 0.007 | 0.860  | 0.075 |
| Lymphoma                                   | <0.001 | <0.001 | >1000  | 0.992 | <0.001 | <0.001 | >1000 | 0.992 | 0.604 | 0.081 | 2.930  | 0.565 |
| Length of hospital stay                    | 1.022  | 1.008  | 1.040  | 0.003 | 1.021  | 1.007  | 1.040 | 0.003 | 0.992 | 0.978 | 1.010  | 0.244 |

OR: Odds Ratio; 95% CI: Confidence Interval; NG: Nagelkerke pseudo R<sup>2</sup>; LR: Likelihood Ratio; ICU: intensive care unit; GGT: gamma-glutamyltransferase; ALP:alkaline phosphatase; Diabetes-1:diabetes mellitus type 1. including LADA; Diabetes-2: diabetes mellitus type 2 treated with oral medications; Diabetes-3: diabetes mellitus type 2 treated with insulin; Diabetes-4: prediabetes; COPD: chronic obstructive pulmonary disease; TIA: transient ischemic attack

Table S14. Model for GGT and ALT adjusted for comorbidities and potential risk factors, n=401.

|              | ICU admission |        |         |                   |        |         |         | Mechanical ventilation |        |         |                   |         |         |         | Fatal outcome |        |         |                   |         |         |       |
|--------------|---------------|--------|---------|-------------------|--------|---------|---------|------------------------|--------|---------|-------------------|---------|---------|---------|---------------|--------|---------|-------------------|---------|---------|-------|
|              |               |        |         | p-value for model |        |         |         |                        |        |         | p-value for model |         |         |         |               |        |         | p-value for model |         |         |       |
|              | OR            | CI 95% | p-value | NG                | LR     | p-value |         | OR                     | CI 95% | p-value | NG                | LR      | p-value |         | OR            | CI 95% | p-value | NG                | LR      | p-value |       |
|              |               | 2.5%   | 97.5%   |                   |        |         |         |                        | 2.5%   | 97.5%   |                   |         |         |         |               | 2.5%   | 97.5%   |                   |         |         |       |
| GGT          | 1.000         | 0.999  | 1.000   | 0.824             | 0.0003 | 0.238   | <0.0001 | 1.000                  | 0.999  | 1.000   | 0.697             | <0.0001 | 0.242   | <0.0001 | 1.001         | 0.999  | 1.000   | 0.340             | <0.0001 | 0.158   | 0.001 |
| ALT          | 1.000         | 0.998  | 1.000   | 0.590             |        |         |         | 1.000                  | 0.998  | 1.000   | 0.519             |         |         |         | 1.001         | 1.000  | 1.000   | 0.185             |         |         |       |
| Hypertension | 1.200         | 0.726  | 1.980   | 0.482             |        |         |         | 1.480                  | 0.892  | 2.490   | 0.131             |         |         |         | 1.702         | 1.018  | 2.880   | 0.044             |         |         |       |
| Diabetes -1  | 0.239         | 0.012  | 1.510   | 0.199             |        |         |         | 0.246                  | 0.013  | 1.570   | 0.211             |         |         |         | 0.614         | 0.111  | 2.660   | 0.537             |         |         |       |
| Diabetes -2  | 1.100         | 0.574  | 2.070   | 0.781             |        |         |         | 1.110                  | 0.577  | 2.110   | 0.752             |         |         |         | 1.338         | 0.729  | 2.430   | 0.342             |         |         |       |

|                                            |        |        |        |       |        |        |       |       |       |       |        |       |
|--------------------------------------------|--------|--------|--------|-------|--------|--------|-------|-------|-------|-------|--------|-------|
| Diabetes -3                                | 1.190  | 0.439  | 3.100  | 0.728 | 1.330  | 0.485  | 3.540 | 0.571 | 0.875 | 0.346 | 2.100  | 0.769 |
| Diabetes - 4                               | 1.380  | 0.323  | 5.720  | 0.654 | 1.380  | 0.321  | 5.820 | 0.654 | 2.674 | 0.662 | 10.960 | 0.159 |
| Asthma                                     | 1.440  | 0.420  | 4.780  | 0.547 | 1.040  | 0.283  | 3.490 | 0.945 | 0.717 | 0.144 | 2.550  | 0.638 |
| COPD                                       | <0.001 | <0.001 | >1000  | 0.992 | <0.001 | <0.001 | >1000 | 0.992 | 0.988 | 0.232 | 3.670  | 0.986 |
| Dementia                                   | <0.001 | <0.001 | >1000  | 0.987 | <0.001 | <0.001 | >1000 | 0.987 | 3.133 | 1.282 | 7.960  | 0.013 |
| Stroke/TIA in patient history              | 0.665  | 0.255  | 1.600  | 0.378 | 0.750  | 0.287  | 1.810 | 0.536 | 1.081 | 0.492 | 2.310  | 0.843 |
| Chronic kidney disease                     | 0.337  | 0.162  | 0.660  | 0.002 | 0.325  | 0.153  | 0.650 | 0.002 | 0.778 | 0.425 | 1.400  | 0.407 |
| Active smoker                              | 0.535  | 0.131  | 1.840  | 0.342 | 0.396  | 0.081  | 1.470 | 0.196 | 0.911 | 0.292 | 2.630  | 0.866 |
| Former smoker                              | 0.409  | 0.105  | 1.310  | 0.157 | 0.317  | 0.068  | 1.090 | 0.094 | 0.736 | 0.236 | 2.100  | 0.578 |
| Myocardial infraction in patient history   | 1.690  | 0.783  | 3.640  | 0.179 | 1.580  | 0.719  | 3.470 | 0.249 | 2.758 | 1.416 | 5.450  | 0.003 |
| Heart failure                              | 0.824  | 0.388  | 1.700  | 0.606 | 0.604  | 0.273  | 1.280 | 0.198 | 1.430 | 0.759 | 2.670  | 0.264 |
| Leukemia                                   | 2.960  | 0.694  | 13.310 | 0.139 | 1.110  | 0.206  | 4.870 | 0.894 | 4.636 | 1.136 | 23.220 | 0.039 |
| Solid malignant disease without metastases | 0.764  | 0.264  | 2.050  | 0.602 | 0.643  | 0.210  | 1.760 | 0.408 | 1.575 | 0.629 | 3.880  | 0.323 |
| Solid malignant disease with metastases    | <0.001 | <0.001 | >1000  | 0.993 | <0.001 | <0.001 | >1000 | 0.993 | 0.166 | 0.009 | 0.990  | 0.101 |
| Lymphoma                                   | <0.001 | <0.001 | >1000  | 0.992 | <0.001 | <0.001 | >1000 | 0.992 | 0.633 | 0.084 | 3.080  | 0.602 |
| Length of hospital stay                    | 1.020  | 1.010  | 1.030  | 0.004 | 1.020  | 1.010  | 1.030 | 0.005 | 0.993 | 0.979 | 1.010  | 0.319 |

OR: Odds Ratio; 95% CI: Confidence Interval; NG: Nagelkerke pseudo R<sup>2</sup>; LR: Likelihood Ratio; ICU: intensive care unit; GGT: gamma-glutamyltransferase; ALT:alanine aminotransferase; Diabetes-1:diabetes mellitus type 1. including LADA; Diabetes-2: diabetes mellitus type 2 treated with oral medications; Diabetes-3: diabetes mellitus type 2 treated with insulin; Diabetes-4: prediabetes; COPD: chronic obstructive pulmonary disease; TIA: transient ischemic attack

Table S15. Model for GGT and AST adjusted for comorbidities and potential risk factors, n=401.

|              | ICU admission     |        |         |       |            |       |         | Mechanical ventilation |        |         |       |            |       |         | Fatal outcome     |        |         |       |            |       |        |
|--------------|-------------------|--------|---------|-------|------------|-------|---------|------------------------|--------|---------|-------|------------|-------|---------|-------------------|--------|---------|-------|------------|-------|--------|
|              | p-value for model |        |         |       | LR p-value |       |         | p-value for model      |        |         |       | LR p-value |       |         | p-value for model |        |         |       | LR p-value |       |        |
|              | OR                | CI 95% | p-value | model | NG         |       |         | OR                     | CI 95% | p-value | model | NG         |       |         | OR                | CI 95% | p-value | model | NG         |       |        |
|              |                   | 2.5%   | 97.5%   |       |            |       |         |                        | 2.5%   | 97.5%   |       |            |       |         |                   | 2.5%   | 97.5%   |       |            |       |        |
| GGT          | 1.000             | 0.999  | 1.000   | 0.853 | 0.0003     | 0.238 | <0.0001 | 1.000                  | 0.999  | 1.000   | 0.821 | 0.0001     | 0.243 | <0.0001 | 1.000             | 0.999  | 1.000   | 0.763 | <0.0001    | 0.179 | 0.0001 |
| AST          | 1.000             | 0.998  | 1.000   | 0.658 |            |       |         | 1.000                  | 0.999  | 1.000   | 0.378 |            |       |         | 1.003             | 1.001  | 1.010   | 0.014 |            |       |        |
| Hypertension | 1.190             | 0.722  | 1.970   | 0.496 |            |       |         | 1.480                  | 0.891  | 2.480   | 0.132 |            |       |         | 1.750             | 1.043  | 2.970   | 0.036 |            |       |        |
| Diabetes -1  | 0.238             | 0.012  | 1.500   | 0.198 |            |       |         | 0.246                  | 0.013  | 1.570   | 0.211 |            |       |         | 0.622             | 0.112  | 2.700   | 0.550 |            |       |        |
| Diabetes -2  | 1.090             | 0.573  | 2.070   | 0.783 |            |       |         | 1.110                  | 0.577  | 2.120   | 0.750 |            |       |         | 1.337             | 0.726  | 2.440   | 0.345 |            |       |        |
| Diabetes -3  | 1.180             | 0.434  | 3.080   | 0.740 |            |       |         | 1.300                  | 0.471  | 3.470   | 0.606 |            |       |         | 0.760             | 0.292  | 1.870   | 0.560 |            |       |        |

|                                            |        |        |        |       |        |        |       |       |       |       |        |       |
|--------------------------------------------|--------|--------|--------|-------|--------|--------|-------|-------|-------|-------|--------|-------|
| Diabetes - 4                               | 1.370  | 0.322  | 5.710  | 0.657 | 1.390  | 0.323  | 5.830 | 0.649 | 2.740 | 0.671 | 11.350 | 0.153 |
| Asthma                                     | 1.490  | 0.440  | 4.880  | 0.511 | 1.050  | 0.288  | 3.510 | 0.932 | 0.650 | 0.113 | 2.470  | 0.570 |
| COPD                                       | <0.001 | <0.001 | >1000  | 0.992 | <0.001 | <0.001 | >1000 | 0.992 | 1.003 | 0.236 | 3.730  | 0.996 |
| Dementia                                   | <0.001 | <0.001 | >1000  | 0.987 | <0.001 | <0.001 | >1000 | 0.985 | 3.000 | 1.214 | 7.670  | 0.018 |
| Stroke/TIA in patient history              | 0.654  | 0.251  | 1.570  | 0.358 | 0.734  | 0.281  | 1.770 | 0.505 | 1.037 | 0.468 | 2.230  | 0.928 |
| Chronic kidney disease                     | 0.341  | 0.163  | 0.680  | 0.003 | 0.336  | 0.158  | 0.670 | 0.003 | 0.859 | 0.466 | 1.550  | 0.618 |
| Active smoker                              | 0.541  | 0.133  | 1.870  | 0.351 | 0.407  | 0.084  | 1.510 | 0.210 | 0.941 | 0.294 | 2.750  | 0.914 |
| Former smoker                              | 0.410  | 0.105  | 1.310  | 0.157 | 0.319  | 0.068  | 1.100 | 0.097 | 0.758 | 0.240 | 2.190  | 0.618 |
| Myocardial infraction in patient history   | 1.680  | 0.781  | 3.630  | 0.182 | 1.590  | 0.720  | 3.480 | 0.248 | 2.817 | 1.443 | 5.590  | 0.003 |
| Heart failure                              | 0.822  | 0.386  | 1.700  | 0.601 | 0.598  | 0.270  | 1.270 | 0.191 | 1.375 | 0.725 | 2.590  | 0.325 |
| Leukemia                                   | 2.970  | 0.696  | 13.350 | 0.138 | 1.130  | 0.209  | 4.950 | 0.877 | 5.022 | 1.224 | 25.280 | 0.031 |
| Solid malignant disease without metastases | 0.751  | 0.259  | 2.010  | 0.579 | 0.625  | 0.203  | 1.710 | 0.379 | 1.514 | 0.594 | 3.790  | 0.375 |
| Solid malignant disease with metastases    | <0.001 | <0.001 | >1000  | 0.993 | <0.001 | <0.001 | >1000 | 0.993 | 0.177 | 0.009 | 1.070  | 0.115 |
| Lymphoma                                   | <0.001 | <0.001 | >1000  | 0.992 | <0.001 | <0.001 | >1000 | 0.992 | 0.681 | 0.090 | 3.320  | 0.662 |
| Length of hospital stay                    | 1.020  | 1.010  | 1.030  | 0.004 | 1.020  | 1.010  | 1.030 | 0.005 | 0.993 | 0.979 | 1.010  | 0.322 |

OR: Odds Ratio; 95% CI: Confidence Interval; NG: Nagelkerke pseudo R<sup>2</sup>; LR: Likelihood Ratio; ICU: intensive care unit; GGT: gamma-glutamyltransferase; AST: aspartate aminotransferase; Diabetes-1: diabetes mellitus type 1, including LADA; Diabetes-2: diabetes mellitus type 2 treated with oral medications; Diabetes-3: diabetes mellitus type 2 treated with insulin; Diabetes-4: prediabetes; COPD: chronic obstructive pulmonary disease; TIA: transient ischemic attack

Table S16. Model for GGT and albumin adjusted for comorbidities and potential risk factors, n=401.

|              | ICU admission |        |         |                   |        |       |         | Mechanical ventilation |        |         |                   |         |       |         | Fatal outcome |        |         |                   |         |       |         |
|--------------|---------------|--------|---------|-------------------|--------|-------|---------|------------------------|--------|---------|-------------------|---------|-------|---------|---------------|--------|---------|-------------------|---------|-------|---------|
|              |               |        |         | p-value for model |        | NG    |         |                        |        |         | p-value for model |         | NG    |         |               |        |         | p-value for model |         | NG    |         |
|              | OR            | CI 95% | p-value |                   |        |       |         | OR                     | CI 95% | p-value |                   |         |       |         | OR            | CI 95% | p-value |                   |         |       |         |
|              |               | 2.5%   | 97.5%   |                   |        |       |         |                        | 2.5%   | 97.5%   |                   |         |       |         |               | 2.5%   | 97.5%   |                   |         |       |         |
| GGT          | 1.000         | 0.999  | 1.000   | 0.864             | 0.0001 | 0.324 | <0.0001 | 1.000                  | 6.796  | 1.000   | 0.757             | <0.0001 | 0.341 | <0.0001 | 1.001         | 1.000  | 1.000   | 0.227             | <0.0001 | 0.278 | <0.0001 |
| albumin      | 0.281         | 0.172  | 0.450   | <0.0001           |        |       |         | 0.248                  | 0.999  | 0.400   | <0.0001           |         |       |         | 0.233         | 0.143  | 0.370   | <0.0001           |         |       |         |
| Hypertension | 1.115         | 0.660  | 1.890   | 0.684             |        |       |         | 1.438                  | 0.840  | 2.480   | 0.188             |         |       |         | 1.580         | 0.922  | 2.740   | 0.098             |         |       |         |
| Diabetes -1  | 0.201         | 0.010  | 1.270   | 0.148             |        |       |         | 0.201                  | 0.010  | 1.290   | 0.151             |         |       |         | 0.578         | 0.111  | 2.380   | 0.470             |         |       |         |
| Diabetes -2  | 1.077         | 0.546  | 2.100   | 0.829             |        |       |         | 1.081                  | 0.542  | 2.130   | 0.824             |         |       |         | 1.301         | 0.678  | 2.470   | 0.423             |         |       |         |
| Diabetes -3  | 1.248         | 0.448  | 3.370   | 0.663             |        |       |         | 1.407                  | 0.494  | 3.920   | 0.514             |         |       |         | 0.930         | 0.352  | 2.330   | 0.880             |         |       |         |
| Diabetes - 4 | 1.704         | 0.375  | 7.540   | 0.477             |        |       |         | 1.753                  | 0.378  | 7.960   | 0.461             |         |       |         | 3.576         | 0.837  | 15.530  | 0.081             |         |       |         |

|                                            |        |        |        |       |        |        |       |       |       |       |        |       |
|--------------------------------------------|--------|--------|--------|-------|--------|--------|-------|-------|-------|-------|--------|-------|
| Asthma                                     | 1.646  | 0.466  | 5.700  | 0.427 | 1.169  | 0.307  | 4.110 | 0.809 | 0.903 | 0.190 | 3.230  | 0.884 |
| COPD                                       | <0.001 | <0.001 | >1000  | 0.991 | <0.001 | <0.001 | >1000 | 0.991 | 0.709 | 0.148 | 2.880  | 0.642 |
| Dementia                                   | <0.001 | <0.001 | >1000  | 0.987 | <0.001 | <0.001 | >1000 | 0.987 | 2.010 | 0.771 | 5.380  | 0.155 |
| Stroke/TIA in patient history              | 0.651  | 0.243  | 1.610  | 0.368 | 0.710  | 0.261  | 1.800 | 0.482 | 1.232 | 0.550 | 2.700  | 0.605 |
| Chronic kidney disease                     | 0.265  | 0.124  | 0.540  | 0.000 | 0.245  | 0.112  | 0.510 | 0.000 | 0.585 | 0.305 | 1.090  | 0.098 |
| Active smoker                              | 0.665  | 0.153  | 2.500  | 0.560 | 0.484  | 0.094  | 1.940 | 0.333 | 1.503 | 0.435 | 4.820  | 0.503 |
| Former smoker                              | 0.423  | 0.102  | 1.430  | 0.192 | 0.309  | 0.062  | 1.150 | 0.106 | 0.774 | 0.226 | 2.420  | 0.670 |
| Myocardial infraction in patient history   | 1.572  | 0.708  | 3.480  | 0.262 | 1.448  | 0.636  | 3.260 | 0.372 | 2.744 | 1.359 | 5.630  | 0.005 |
| Heart failure                              | 0.879  | 0.402  | 1.870  | 0.740 | 0.622  | 0.271  | 1.360 | 0.246 | 1.748 | 0.894 | 3.410  | 0.101 |
| Leukemia                                   | 4.546  | 0.989  | 22.540 | 0.052 | 1.624  | 0.281  | 7.890 | 0.558 | 8.265 | 1.776 | 48.570 | 0.010 |
| Solid malignant disease without metastases | 0.587  | 0.192  | 1.660  | 0.327 | 0.470  | 0.142  | 1.390 | 0.190 | 1.234 | 0.468 | 3.210  | 0.665 |
| Solid malignant disease with metastases    | <0.001 | <0.001 | 0.993  | 0.993 | <0.001 | <0.001 | >1000 | 0.993 | 0.090 | 0.004 | 0.620  | 0.038 |
| Lymphoma                                   | <0.001 | <0.001 | >1000  | 0.992 | <0.001 | <0.001 | >1000 | 0.992 | 1.028 | 0.128 | 5.730  | 0.976 |
| Length of hospital stay                    | 1.013  | 0.998  | 1.030  | 0.089 | 1.012  | 0.997  | 1.030 | 0.116 | 0.983 | 0.968 | 1.000  | 0.031 |

OR: Odds Ratio; 95% CI: Confidence Interval; NG: Nagelkerke pseudo R<sup>2</sup>; LR: Likelihood Ratio; ICU: intensive care unit; GGT: gamma-glutamyltransferase; Diabetes-1:diabetes mellitus type 1. including LADA; Diabetes-2: diabetes mellitus type 2 treated with oral medications; Diabetes-3: diabetes mellitus type 2 treated with insulin; Diabetes-4: prediabetes; COPD: chronic obstructive pulmonary disease; TIA: transient ischemic attack

Table S17. Model for ALT and AST adjusted for comorbidities and potential risk factors, n=401.

|              | ICU admission |        |         |                   |        |            |         | Mechanical ventilation |        |         |                   |        |            |         | Fatal outcome |        |         |                   |         |            |         |
|--------------|---------------|--------|---------|-------------------|--------|------------|---------|------------------------|--------|---------|-------------------|--------|------------|---------|---------------|--------|---------|-------------------|---------|------------|---------|
|              |               |        |         | p-value for model |        | LR p-value |         |                        |        |         | p-value for model |        | LR p-value |         |               |        |         | p-value for model |         | LR p-value |         |
|              | OR            | CI 95% | p-value | model             | NG     |            |         | OR                     | CI 95% | p-value | model             | NG     |            |         | OR            | CI 95% | p-value | model             | NG      |            |         |
|              | 2.5%          | 97.5%  |         |                   |        |            |         | 2.5%                   | 97.5%  |         |                   |        |            |         | 2.5%          | 97.5%  |         |                   |         |            |         |
| ALT          | 1.000         | 0.996  | 1.000   | 0.770             | 0.0003 | 0.238      | <0.0001 | 0.999                  | 0.995  | 1.000   | 0.824             | 0.0001 | 0.243      | <0.0001 | 0.993         | 0.986  | 1.000   | 0.026             | <0.0001 | 0.196      | <0.0001 |
| AST          | 1.000         | 0.996  | 1.000   | 0.969             |        |            |         | 1.000                  | 0.998  | 1.010   | 0.470             |        |            |         | 1.009         | 1.004  | 1.020   | 0.002             |         |            |         |
| Hypertension | 1.190         | 0.725  | 1.980   | 0.487             |        |            |         | 1.470                  | 0.885  | 2.470   | 0.139             |        |            |         | 1.676         | 0.994  | 2.860   | 0.055             |         |            |         |
| Diabetes -1  | 0.240         | 0.012  | 1.520   | 0.201             |        |            |         | 0.247                  | 0.013  | 1.580   | 0.212             |        |            |         | 0.617         | 0.111  | 2.660   | 0.541             |         |            |         |
| Diabetes -2  | 1.100         | 0.575  | 2.070   | 0.777             |        |            |         | 1.110                  | 0.577  | 2.120   | 0.749             |        |            |         | 1.318         | 0.711  | 2.420   | 0.375             |         |            |         |
| Diabetes -3  | 1.190         | 0.437  | 3.120   | 0.728             |        |            |         | 1.290                  | 0.468  | 3.460   | 0.611             |        |            |         | 0.669         | 0.248  | 1.680   | 0.406             |         |            |         |
| Diabetes - 4 | 1.380         | 0.323  | 5.720   | 0.654             |        |            |         | 1.390                  | 0.323  | 5.820   | 0.650             |        |            |         | 2.648         | 0.642  | 11.070  | 0.170             |         |            |         |
| Asthma       | 1.440         | 0.420  | 4.820   | 0.547             |        |            |         | 1.080                  | 0.289  | 3.640   | 0.908             |        |            |         | 0.862         | 0.164  | 3.190   | 0.839             |         |            |         |



|                                            |        |        |        |       |        |        |       |       |       |       |        |       |
|--------------------------------------------|--------|--------|--------|-------|--------|--------|-------|-------|-------|-------|--------|-------|
| COPD                                       | <0.001 | <0.001 | >1000  | 0.992 | <0.001 | <0.001 | >1000 | 0.992 | 0.943 | 0.221 | 3.530  | 0.933 |
| Dementia                                   | <0.001 | <0.001 | >1000  | 0.987 | <0.001 | <0.001 | >1000 | 0.984 | 2.791 | 1.120 | 7.170  | 0.029 |
| Stroke/TIA in patient history              | 0.659  | 0.253  | 1.580  | 0.368 | 0.718  | 0.274  | 1.740 | 0.477 | 0.929 | 0.412 | 2.030  | 0.856 |
| Chronic kidney disease                     | 0.337  | 0.160  | 0.670  | 0.003 | 0.340  | 0.159  | 0.690 | 0.004 | 0.926 | 0.500 | 1.680  | 0.804 |
| Active smoker                              | 0.539  | 0.132  | 1.860  | 0.349 | 0.414  | 0.085  | 1.530 | 0.218 | 1.000 | 0.314 | 2.920  | 1.000 |
| Former smoker                              | 0.413  | 0.106  | 1.320  | 0.160 | 0.321  | 0.069  | 1.110 | 0.099 | 0.757 | 0.235 | 2.230  | 0.624 |
| Myocardial infraction in patient history   | 1.680  | 0.780  | 3.620  | 0.183 | 1.580  | 0.717  | 3.450 | 0.254 | 2.735 | 1.394 | 5.450  | 0.004 |
| Heart failure                              | 0.824  | 0.387  | 1.700  | 0.607 | 0.596  | 0.268  | 1.260 | 0.188 | 1.367 | 0.714 | 2.590  | 0.341 |
| Leukemia                                   | 2.960  | 0.693  | 13.300 | 0.139 | 1.130  | 0.210  | 4.970 | 0.873 | 5.382 | 1.309 | 27.150 | 0.024 |
| Solid malignant disease without metastases | 0.766  | 0.263  | 2.060  | 0.607 | 0.618  | 0.199  | 1.710 | 0.372 | 1.442 | 0.553 | 3.660  | 0.442 |
| Solid malignant disease with metastases    | <0.001 | <0.001 | >1000  | 0.993 | <0.001 | <0.001 | 0.000 | 0.993 | 0.204 | 0.010 | 1.320  | 0.159 |
| Lymphoma                                   | <0.001 | <0.001 | >1000  | 0.992 | <0.001 | <0.001 | 0.000 | 0.992 | 0.675 | 0.089 | 3.300  | 0.655 |
| Length of hospital stay                    | 1.020  | 1.010  | 1.030  | 0.004 | 1.020  | 1.010  | 1.030 | 0.005 | 0.993 | 0.978 | 1.010  | 0.295 |

OR: Odds Ratio; 95% CI: Confidence Interval; NG: Nagelkerke pseudo R<sup>2</sup>; LR: Likelihood Ratio; ICU: intensive care unit; ALT:alanine aminotransferase; AST:aspartate aminotransferase; Diabetes-1:diabetes mellitus type 1. including LADA; Diabetes-2: diabetes mellitus type 2 treated with oral medications; Diabetes-3: diabetes mellitus type 2 treated with insulin; Diabetes-4: prediabetes; COPD: chronic obstructive pulmonary disease; TIA: transient ischemic attack

Table S18. Model for ALP and AST adjusted for comorbidities and potential risk factors, n=401.

|              | ICU admission |        |         |         |       |            |         | Mechanical ventilation |        |         |         |        |            |         | Fatal outcome |        |         |         |         |            |        |
|--------------|---------------|--------|---------|---------|-------|------------|---------|------------------------|--------|---------|---------|--------|------------|---------|---------------|--------|---------|---------|---------|------------|--------|
|              |               |        |         | p-value |       |            |         |                        |        |         | p-value |        |            |         |               |        |         | p-value |         |            |        |
|              | OR            | CI 95% | p-value | model   | NG    | LR p-value |         | OR                     | CI 95% | p-value | model   | NG     | LR p-value |         | OR            | CI 95% | p-value | model   | NG      | LR p-value |        |
|              | 2.5%          | 97.5%  |         |         |       |            |         | 2.5%                   | 97.5%  |         |         |        |            |         | 2.5%          | 97.5%  |         |         |         |            |        |
| ALP          | 0.998         | 0.995  | 1.000   | 0.269   | 0.001 | 0.242      | <0.0001 | 0.998                  | 0.995  | 1.000   | 0.243   | 0.0003 | 0.248      | <0.0001 | 1.001         | 0.999  | 1.000   | 0.463   | <0.0001 | 0.180      | 0.0001 |
| AST          | 1.000         | 0.999  | 1.000   | 0.336   |       |            |         | 1.000                  | 0.999  | 1.000   | 0.163   |        |            |         | 1.003         | 1.001  | 1.010   | 0.020   |         |            |        |
| Hypertension | 1.200         | 0.729  | 1.990   | 0.471   |       |            |         | 1.500                  | 0.901  | 2.520   | 0.121   |        |            |         | 1.729         | 1.029  | 2.940   | 0.040   |         |            |        |
| Diabetes -1  | 0.280         | 0.014  | 1.850   | 0.259   |       |            |         | 0.296                  | 0.015  | 1.990   | 0.284   |        |            |         | 0.558         | 0.098  | 2.500   | 0.471   |         |            |        |
| Diabetes -2  | 1.090         | 0.569  | 2.060   | 0.798   |       |            |         | 1.100                  | 0.572  | 2.110   | 0.766   |        |            |         | 1.344         | 0.729  | 2.450   | 0.338   |         |            |        |
| Diabetes -3  | 1.140         | 0.415  | 2.990   | 0.796   |       |            |         | 1.250                  | 0.450  | 3.380   | 0.657   |        |            |         | 0.781         | 0.299  | 1.920   | 0.600   |         |            |        |
| Diabetes - 4 | 1.360         | 0.321  | 5.630   | 0.665   |       |            |         | 1.380                  | 0.321  | 5.750   | 0.658   |        |            |         | 2.748         | 0.672  | 11.390  | 0.151   |         |            |        |
| Asthma       | 1.510         | 0.443  | 4.970   | 0.499   |       |            |         | 1.060                  | 0.287  | 3.570   | 0.924   |        |            |         | 0.648         | 0.112  | 2.470   | 0.568   |         |            |        |
| COPD         | <0.001        | <0.001 | >1000   | 0.992   |       |            |         | <0.001                 | <0.001 | >1000   | 0.992   |        |            |         | 0.997         | 0.234  | 3.710   | 0.997   |         |            |        |

|                                            |        |        |        |       |        |        |       |       |       |       |        |       |
|--------------------------------------------|--------|--------|--------|-------|--------|--------|-------|-------|-------|-------|--------|-------|
| Dementia                                   | <0.001 | <0.001 | >1000  | 0.984 | <0.001 | <0.001 | >1000 | 0.979 | 3.009 | 1.220 | 7.680  | 0.018 |
| Stroke/TIA in patient history              | 0.637  | 0.245  | 1.520  | 0.328 | 0.712  | 0.273  | 1.720 | 0.464 | 1.045 | 0.473 | 2.250  | 0.912 |
| Chronic kidney disease                     | 0.352  | 0.168  | 0.700  | 0.004 | 0.348  | 0.164  | 0.700 | 0.004 | 0.848 | 0.459 | 1.530  | 0.592 |
| Active smoker                              | 0.535  | 0.131  | 1.840  | 0.342 | 0.403  | 0.083  | 1.490 | 0.205 | 0.958 | 0.300 | 2.800  | 0.940 |
| Former smoker                              | 0.417  | 0.106  | 1.330  | 0.165 | 0.326  | 0.070  | 1.120 | 0.103 | 0.761 | 0.241 | 2.200  | 0.624 |
| Myocardial infraction in patient history   | 1.670  | 0.773  | 3.600  | 0.190 | 1.560  | 0.709  | 3.440 | 0.264 | 2.834 | 1.451 | 5.620  | 0.003 |
| Heart failure                              | 0.821  | 0.384  | 1.700  | 0.602 | 0.595  | 0.267  | 1.270 | 0.190 | 1.371 | 0.723 | 2.580  | 0.329 |
| Leukemia                                   | 3.070  | 0.718  | 13.850 | 0.127 | 1.160  | 0.214  | 5.120 | 0.847 | 4.928 | 1.201 | 24.810 | 0.033 |
| Solid malignant disease without metastases | 0.835  | 0.284  | 2.280  | 0.730 | 0.708  | 0.229  | 1.970 | 0.523 | 1.473 | 0.571 | 3.710  | 0.412 |
| Solid malignant disease with metastases    | <0.001 | <0.001 | >1000  | 0.993 | <0.001 | <0.001 | >1000 | 0.993 | 0.154 | 0.008 | 0.980  | 0.096 |
| Lymphoma                                   | <0.001 | <0.001 | >1000  | 0.992 | <0.001 | <0.001 | >1000 | 0.992 | 0.681 | 0.091 | 3.320  | 0.662 |
| Length of hospital stay                    | 1.020  | 1.010  | 1.040  | 0.003 | 1.020  | 1.010  | 1.040 | 0.004 | 0.993 | 0.978 | 1.010  | 0.295 |

OR: Odds Ratio; 95% CI: Confidence Interval; NG: Nagelkerke pseudo R<sup>2</sup>; LR: Likelihood Ratio; ICU: intensive care unit; ALP:alkaline phosphatase; AST:aspartate aminotransferase; Diabetes-1:diabetes mellitus type 1. including LADA; Diabetes-2: diabetes mellitus type 2 treated with oral medications; Diabetes-3: diabetes mellitus type 2 treated with insulin; Diabetes-4: prediabetes; COPD: chronic obstructive pulmonary disease; TIA: transient ischemic attack

Table S19. Model for TBIL and AST adjusted for comorbidities and potential risk factors, n=401.

|              | ICU admission |        |         |         |       |            |         | Mechanical ventilation |        |         |         |        |            |         | Fatal outcome |        |         |         |         |            |         |
|--------------|---------------|--------|---------|---------|-------|------------|---------|------------------------|--------|---------|---------|--------|------------|---------|---------------|--------|---------|---------|---------|------------|---------|
|              |               |        |         | p-value |       |            |         |                        |        |         | p-value |        |            |         |               |        |         | p-value |         |            |         |
|              | OR            | CI 95% | p-value | model   | NG    | LR p-value |         | OR                     | CI 95% | p-value | model   | NG     | LR p-value |         | OR            | CI 95% | p-value | model   | NG      | LR p-value |         |
|              |               | 2.5%   | 97.5%   |         |       |            |         |                        | 2.5%   | 97.5%   |         |        |            |         |               | 2.5%   | 97.5%   |         |         |            |         |
| TBIL         | 0.927         | 0.661  | 1.250   | 0.629   | 0.001 | 0.238      | <0.0001 | 0.919                  | 0.657  | 1.240   | 0.592   | 0.0003 | 0.244      | <0.0001 | 1.471         | 1.068  | 2.090   | 0.023   | <0.0001 | 0.195      | <0.0001 |
| AST          | 1.000         | 0.998  | 1.000   | 0.508   |       |            |         | 1.000                  | 0.999  | 1.000   | 0.270   |        |            |         | 1.003         | 1.000  | 1.010   | 0.038   |         |            |         |
| Hypertension | 1.190         | 0.724  | 1.970   | 0.490   |       |            |         | 1.490                  | 0.895  | 2.490   | 0.128   |        |            |         | 1.808         | 1.070  | 3.090   | 0.028   |         |            |         |
| Diabetes -1  | 0.239         | 0.012  | 1.510   | 0.199   |       |            |         | 0.248                  | 0.013  | 1.580   | 0.213   |        |            |         | 0.698         | 0.127  | 3.020   | 0.649   |         |            |         |
| Diabetes -2  | 1.080         | 0.563  | 2.040   | 0.818   |       |            |         | 1.090                  | 0.566  | 2.090   | 0.788   |        |            |         | 1.453         | 0.785  | 2.670   | 0.230   |         |            |         |
| Diabetes -3  | 1.160         | 0.424  | 3.040   | 0.768   |       |            |         | 1.280                  | 0.459  | 3.430   | 0.632   |        |            |         | 0.807         | 0.309  | 1.990   | 0.649   |         |            |         |
| Diabetes - 4 | 1.360         | 0.320  | 5.640   | 0.667   |       |            |         | 1.370                  | 0.320  | 5.750   | 0.660   |        |            |         | 2.886         | 0.709  | 11.860  | 0.131   |         |            |         |
| Asthma       | 1.430         | 0.418  | 4.760   | 0.553   |       |            |         | 1.010                  | 0.270  | 3.420   | 0.985   |        |            |         | 0.752         | 0.139  | 2.790   | 0.700   |         |            |         |
| COPD         | <0.001        | <0.001 | >1000   | 0.992   |       |            |         | <0.001                 | <0.001 | >1000   | 0.992   |        |            |         | 0.883         | 0.196  | 3.400   | 0.861   |         |            |         |
| Dementia     | <0.001        | <0.001 | >1000   | 0.986   |       |            |         | <0.001                 | <0.001 | >1000   | 0.982   |        |            |         | 3.057         | 1.237  | 7.840   | 0.017   |         |            |         |

|                                            |        |        |        |       |        |        |       |       |       |       |        |       |
|--------------------------------------------|--------|--------|--------|-------|--------|--------|-------|-------|-------|-------|--------|-------|
| Stroke/TIA in patient history              | 0.650  | 0.250  | 1.550  | 0.349 | 0.727  | 0.279  | 1.750 | 0.490 | 1.007 | 0.453 | 2.170  | 0.987 |
| Chronic kidney disease                     | 0.341  | 0.163  | 0.680  | 0.003 | 0.336  | 0.158  | 0.670 | 0.003 | 0.858 | 0.463 | 1.560  | 0.619 |
| Active smoker                              | 0.540  | 0.133  | 1.860  | 0.350 | 0.406  | 0.083  | 1.500 | 0.208 | 0.921 | 0.287 | 2.710  | 0.885 |
| Former smoker                              | 0.415  | 0.106  | 1.330  | 0.163 | 0.324  | 0.069  | 1.110 | 0.101 | 0.748 | 0.234 | 2.190  | 0.607 |
| Myocardial infarction in patient history   | 1.670  | 0.775  | 3.590  | 0.189 | 1.570  | 0.714  | 3.440 | 0.257 | 2.836 | 1.446 | 5.650  | 0.003 |
| Heart failure                              | 0.833  | 0.390  | 1.730  | 0.629 | 0.605  | 0.272  | 1.290 | 0.203 | 1.233 | 0.645 | 2.330  | 0.522 |
| Leukemia                                   | 2.950  | 0.692  | 13.250 | 0.141 | 1.120  | 0.209  | 4.920 | 0.881 | 5.236 | 1.275 | 26.330 | 0.026 |
| Solid malignant disease without metastases | 0.774  | 0.266  | 2.090  | 0.622 | 0.649  | 0.211  | 1.790 | 0.420 | 1.483 | 0.569 | 3.770  | 0.409 |
| Solid malignant disease with metastases    | <0.001 | <0.001 | >1000  | 0.993 | <0.001 | <0.001 | >1000 | 0.993 | 0.109 | 0.005 | 0.760  | 0.062 |
| Lymphoma                                   | <0.001 | <0.001 | >1000  | 0.992 | <0.001 | <0.001 | >1000 | 0.992 | 0.686 | 0.088 | 3.470  | 0.676 |
| Length of hospital stay                    | 1.020  | 1.010  | 1.030  | 0.004 | 1.020  | 1.010  | 1.030 | 0.005 | 0.993 | 0.978 | 1.010  | 0.296 |

OR: Odds Ratio; 95% CI: Confidence Interval; NG: Nagelkerke pseudo R<sup>2</sup>; LR: Likelihood Ratio; ICU: intensive care unit; TBIL: total bilirubin; AST: aspartate aminotransferase; Diabetes-1: diabetes mellitus type 1. including LADA; Diabetes-2: diabetes mellitus type 2 treated with oral medications; Diabetes-3: diabetes mellitus type 2 treated with insulin; Diabetes-4: prediabetes; COPD: chronic obstructive pulmonary disease; TIA: transient ischemic attack

Table S20. Model for ALT and ALP adjusted for comorbidities and potential risk factors, n=401.

|                       | ICU admission |        |       |         |           |       |            | Mechanical ventilation |        |       |         |           |       |            | Fatal outcome |        |        |         |           |       |            |
|-----------------------|---------------|--------|-------|---------|-----------|-------|------------|------------------------|--------|-------|---------|-----------|-------|------------|---------------|--------|--------|---------|-----------|-------|------------|
|                       | OR            | CI 95% |       | p-value | for model | NG    | LR p-value | OR                     | CI 95% |       | p-value | for model | NG    | LR p-value | OR            | CI 95% |        | p-value | for model | NG    | LR p-value |
|                       |               |        |       |         |           |       |            |                        |        |       |         |           |       |            |               |        |        |         |           |       |            |
|                       |               |        |       |         |           |       |            |                        |        |       |         |           |       |            |               |        |        |         |           |       |            |
| 2.5%                  | 97.5%         | 2.5%   | 97.5% | 2.5%    | 97.5%     |       |            |                        |        |       |         |           |       |            |               |        |        |         |           |       |            |
| ALT                   | 1.000         | 0.999  | 1.000 | 0.370   | 0.001     | 0.241 | <0.0001    | 1.000                  | 0.999  | 1.000 | 0.319   | 0.0004    | 0.245 | <0.0001    | 1.001         | 1.000  | 1.000  | 0.251   | <0.0001   | 0.162 | 0.0004     |
| ALP                   | 0.999         | 0.995  | 1.000 | 0.318   |           |       |            | 0.999                  | 0.995  | 1.000 | 0.364   |           |       |            | 1.001         | 1.000  | 1.000  | 0.156   |           |       |            |
| Hypertension          | 1.210         | 0.731  | 2.000 | 0.465   |           |       |            | 1.490                  | 0.897  | 2.500 | 0.126   |           |       |            | 1.648         | 0.985  | 2.790  | 0.059   |           |       |            |
| Diabetes -1           | 0.278         | 0.014  | 1.830 | 0.257   |           |       |            | 0.288                  | 0.014  | 1.920 | 0.272   |           |       |            | 0.510         | 0.090  | 2.270  | 0.403   |           |       |            |
| Diabetes -2           | 1.090         | 0.571  | 2.060 | 0.790   |           |       |            | 1.110                  | 0.575  | 2.110 | 0.757   |           |       |            | 1.356         | 0.738  | 2.470  | 0.321   |           |       |            |
| Diabetes -3           | 1.170         | 0.431  | 3.060 | 0.750   |           |       |            | 1.320                  | 0.480  | 3.530 | 0.580   |           |       |            | 0.916         | 0.362  | 2.210  | 0.848   |           |       |            |
| Diabetes - 4          | 1.370         | 0.321  | 5.650 | 0.663   |           |       |            | 1.370                  | 0.320  | 5.740 | 0.661   |           |       |            | 2.697         | 0.667  | 11.060 | 0.156   |           |       |            |
| Asthma                | 1.460         | 0.424  | 4.840 | 0.537   |           |       |            | 1.050                  | 0.285  | 3.520 | 0.938   |           |       |            | 0.710         | 0.142  | 2.530  | 0.630   |           |       |            |
| COPD                  | <0.001        | <0.001 | >1000 | 0.992   |           |       |            | <0.001                 | <0.001 | >1000 | 0.992   |           |       |            | 0.973         | 0.229  | 3.620  | 0.968   |           |       |            |
| Dementia              | <0.001        | <0.001 | >1000 | 0.986   |           |       |            | <0.001                 | <0.001 | >1000 | 0.985   |           |       |            | 3.127         | 1.282  | 7.920  | 0.013   |           |       |            |
| Stroke/TIA in patient | 0.654         | 0.251  | 1.570 | 0.359   |           |       |            | 0.734                  | 0.281  | 1.770 | 0.506   |           |       |            | 1.083         | 0.494  | 2.310  | 0.839   |           |       |            |

|                                            |        |        |        |       |        |        |       |       |       |       |        |       |
|--------------------------------------------|--------|--------|--------|-------|--------|--------|-------|-------|-------|-------|--------|-------|
| history                                    |        |        |        |       |        |        |       |       |       |       |        |       |
| Chronic kiedney disease                    | 0.339  | 0.163  | 0.670  | 0.003 | 0.327  | 0.154  | 0.650 | 0.002 | 0.767 | 0.418 | 1.380  | 0.382 |
| Active smoker                              | 0.525  | 0.129  | 1.810  | 0.327 | 0.391  | 0.080  | 1.450 | 0.190 | 0.959 | 0.307 | 2.770  | 0.940 |
| Former smoker                              | 0.415  | 0.106  | 1.320  | 0.162 | 0.324  | 0.069  | 1.110 | 0.100 | 0.749 | 0.240 | 2.140  | 0.602 |
| Myocardial infraction in patient history   | 1.670  | 0.773  | 3.600  | 0.190 | 1.560  | 0.706  | 3.410 | 0.269 | 2.780 | 1.426 | 5.500  | 0.003 |
| Heart failure                              | 0.830  | 0.389  | 1.720  | 0.620 | 0.606  | 0.273  | 1.290 | 0.203 | 1.425 | 0.756 | 2.670  | 0.270 |
| Leukemia                                   | 3.030  | 0.708  | 13.660 | 0.132 | 1.130  | 0.207  | 4.950 | 0.881 | 4.516 | 1.106 | 22.640 | 0.043 |
| Solid malignant disease without metastases | 0.841  | 0.286  | 2.300  | 0.742 | 0.709  | 0.229  | 1.980 | 0.525 | 1.450 | 0.567 | 3.620  | 0.428 |
| Solid malignant disease with metastases    | <0.001 | <0.001 | >1000  | 0.993 | <0.001 | <0.001 | >1000 | 0.993 | 0.133 | 0.007 | 0.840  | 0.073 |
| Lymphoma                                   | <0.001 | <0.001 | >1000  | 0.992 | <0.001 | <0.001 | >1000 | 0.992 | 0.629 | 0.084 | 3.040  | 0.596 |
| Lenght of hospital stav                    | 1.020  | 1.010  | 1.040  | 0.003 | 1.020  | 1.010  | 1.040 | 0.004 | 0.992 | 0.978 | 1.010  | 0.269 |

OR: Odds Ratio; 95% CI: Confidence Interval; NG: Nagelkerke pseudo R<sup>2</sup>; LR: Likelihood Ratio; ICU: intensive care unit; ALP:alkaline phosphatase; ALT:alanine aminotransferase; Diabetes-1:diabetes mellitus type 1. including LADA; Diabetes-2: diabetes mellitus type 2 treated with oral medications; Diabetes-3: diabetes mellitus type 2 treated with insulin; Diabetes-4: prediabetes; COPD: chronic obstructive pulmonary disease; TIA: transient ischemic attack

Table S21. Model for TBIL and ALT adjusted for comorbidities and potential risk factors, n=401.

|                               | ICU admission |        |         |           |       |            |         | Mechanical ventilation |        |         |           |        |            |         | Fatal outcome |        |         |           |         |            |         |
|-------------------------------|---------------|--------|---------|-----------|-------|------------|---------|------------------------|--------|---------|-----------|--------|------------|---------|---------------|--------|---------|-----------|---------|------------|---------|
|                               |               |        |         | p-value   |       |            |         |                        |        |         | p-value   |        |            |         |               |        |         | p-value   |         |            |         |
|                               | OR            | CI 95% | p-value | for model | NG    | LR p-value |         | OR                     | CI 95% | p-value | for model | NG     | LR p-value |         | OR            | CI 95% | p-value | for model | NG      | LR p-value |         |
|                               |               | 2.5%   | 97.5%   |           |       |            |         |                        | 2.5%   | 97.5%   |           |        |            |         |               | 2.5%   | 97.5%   |           |         |            |         |
| TBIL                          | 0.950         | 0.684  | 1.260   | 0.731     | 0.001 | 0.238      | <0.0001 | 0.968                  | 0.699  | 1.280   | 0.825     | 0.0003 | 0.242      | <0.0001 | 1.556         | 1.155  | 2.190   | 0.007     | <0.0001 | 0.183      | <0.0001 |
| ALT                           | 1.000         | 0.998  | 1.000   | 0.523     |       |            |         | 1.000                  | 0.999  | 1.000   | 0.449     |        |            |         | 1.001         | 1.000  | 1.000   | 0.286     |         |            |         |
| Hypertension                  | 1.200         | 0.726  | 1.980   | 0.483     |       |            |         | 1.480                  | 0.891  | 2.480   | 0.132     |        |            |         | 1.751         | 1.040  | 2.980   | 0.037     |         |            |         |
| Diabetes -1                   | 0.240         | 0.012  | 1.520   | 0.201     |       |            |         | 0.249                  | 0.013  | 1.590   | 0.215     |        |            |         | 0.712         | 0.130  | 3.070   | 0.666     |         |            |         |
| Diabetes -2                   | 1.090         | 0.567  | 2.060   | 0.803     |       |            |         | 1.110                  | 0.573  | 2.110   | 0.763     |        |            |         | 1.480         | 0.802  | 2.710   | 0.205     |         |            |         |
| Diabetes -3                   | 1.180         | 0.437  | 3.090   | 0.733     |       |            |         | 1.340                  | 0.487  | 3.560   | 0.564     |        |            |         | 0.912         | 0.358  | 2.220   | 0.841     |         |            |         |
| Diabetes - 4                  | 1.370         | 0.321  | 5.670   | 0.663     |       |            |         | 1.380                  | 0.320  | 5.770   | 0.659     |        |            |         | 2.865         | 0.710  | 11.670  | 0.131     |         |            |         |
| Asthma                        | 1.410         | 0.408  | 4.710   | 0.573     |       |            |         | 1.030                  | 0.276  | 3.460   | 0.966     |        |            |         | 0.860         | 0.178  | 3.030   | 0.830     |         |            |         |
| COPD                          | <0.001        | <0.001 | >1000   | 0.992     |       |            |         | <0.001                 | <0.001 | >1000   | 0.992     |        |            |         | 0.847         | 0.187  | 3.270   | 0.816     |         |            |         |
| Dementia                      | <0.001        | <0.001 | >1000   | 0.987     |       |            |         | <0.001                 | <0.001 | >1000   | 0.986     |        |            |         | 3.178         | 1.296  | 8.120   | 0.013     |         |            |         |
| Stroke/TIA in patient history | 0.661         | 0.254  | 1.580   | 0.370     |       |            |         | 0.740                  | 0.284  | 1.790   | 0.517     |        |            |         | 1.026         | 0.464  | 2.210   | 0.949     |         |            |         |

|                                            |        |        |        |       |        |        |       |       |       |       |        |       |
|--------------------------------------------|--------|--------|--------|-------|--------|--------|-------|-------|-------|-------|--------|-------|
| Chronic kidney disease                     | 0.334  | 0.160  | 0.660  | 0.002 | 0.323  | 0.152  | 0.640 | 0.002 | 0.799 | 0.434 | 1.440  | 0.463 |
| Active smoker                              | 0.534  | 0.131  | 1.840  | 0.341 | 0.397  | 0.082  | 1.470 | 0.198 | 0.922 | 0.293 | 2.680  | 0.884 |
| Former smoker                              | 0.413  | 0.106  | 1.320  | 0.161 | 0.321  | 0.069  | 1.100 | 0.098 | 0.739 | 0.233 | 2.140  | 0.589 |
| Myocardial infarction in patient history   | 1.670  | 0.776  | 3.600  | 0.187 | 1.570  | 0.712  | 3.430 | 0.261 | 2.786 | 1.422 | 5.540  | 0.003 |
| Heart failure                              | 0.834  | 0.391  | 1.730  | 0.630 | 0.607  | 0.274  | 1.290 | 0.205 | 1.253 | 0.658 | 2.370  | 0.488 |
| Leukemia                                   | 2.930  | 0.688  | 13.190 | 0.143 | 1.100  | 0.205  | 4.840 | 0.900 | 4.976 | 1.215 | 24.950 | 0.031 |
| Solid malignant disease without metastases | 0.783  | 0.269  | 2.120  | 0.638 | 0.658  | 0.214  | 1.810 | 0.436 | 1.457 | 0.561 | 3.690  | 0.428 |
| Solid malignant disease with metastases    | <0.001 | <0.001 | >1000  | 0.993 | <0.001 | <0.001 | >1000 | 0.993 | 0.095 | 0.004 | 0.690  | 0.053 |
| Lymphoma                                   | <0.001 | <0.001 | >1000  | 0.992 | <0.001 | <0.001 | >1000 | 0.992 | 0.643 | 0.082 | 3.250  | 0.624 |
| Length of hospital stay                    | 1.020  | 1.010  | 1.030  | 0.004 | 1.020  | 1.010  | 1.030 | 0.005 | 0.993 | 0.979 | 1.010  | 0.288 |

OR: Odds Ratio; 95% CI: Confidence Interval; NG: Nagelkerke pseudo R<sup>2</sup>; LR: Likelihood Ratio; ICU: intensive care unit; TBIL: total bilirubin; ALT: alanine aminotransferase; Diabetes-1: diabetes mellitus type 1. including LADA; Diabetes-2: diabetes mellitus type 2 treated with oral medications; Diabetes-3: diabetes mellitus type 2 treated with insulin; Diabetes-4: prediabetes; COPD: chronic obstructive pulmonary disease; TIA: transient ischemic attack

Table S22. Model for TBIL and ALT adjusted for comorbidities and potential risk factors, n=401.

|                               | ICU admission |        |         |                   |       |       |         | Mechanical ventilation |        |         |                   |       |       |         | Fatal outcome |        |         |                   |         |       |        |
|-------------------------------|---------------|--------|---------|-------------------|-------|-------|---------|------------------------|--------|---------|-------------------|-------|-------|---------|---------------|--------|---------|-------------------|---------|-------|--------|
|                               |               |        |         | p-value for model |       | NG    |         |                        |        |         | p-value for model |       | NG    |         |               |        |         | p-value for model |         | NG    |        |
|                               | OR            | CI 95% | p-value | 2.5%              | 97.5% |       |         | OR                     | CI 95% | p-value | 2.5%              | 97.5% |       |         | OR            | CI 95% | p-value | 2.5%              | 97.5%   |       |        |
| TBIL                          | 1.094         | 0.732  | 1.620   | 0.651             | 0.002 | 0.240 | <0.0001 | 1.112                  | 0.744  | 1.650   | 0.595             | 0.001 | 0.243 | <0.0001 | 1.580         | 1.128  | 2.280   | 0.010             | <0.0001 | 0.177 | 0.0001 |
| ALP                           | 0.998         | 0.995  | 1.000   | 0.352             |       |       |         | 0.999                  | 0.995  | 1.000   | 0.384             |       |       |         | 1.000         | 0.997  | 1.000   | 0.875             |         |       |        |
| Hypertension                  | 1.180         | 0.718  | 1.950   | 0.515             |       |       |         | 1.454                  | 0.877  | 2.430   | 0.149             |       |       |         | 1.710         | 1.020  | 2.900   | 0.044             |         |       |        |
| Diabetes -1                   | 0.275         | 0.014  | 1.820   | 0.253             |       |       |         | 0.285                  | 0.014  | 1.910   | 0.269             |       |       |         | 0.701         | 0.125  | 3.160   | 0.660             |         |       |        |
| Diabetes -2                   | 1.103         | 0.575  | 2.090   | 0.765             |       |       |         | 1.123                  | 0.581  | 2.150   | 0.727             |       |       |         | 1.478         | 0.801  | 2.700   | 0.207             |         |       |        |
| Diabetes -3                   | 1.209         | 0.448  | 3.150   | 0.700             |       |       |         | 1.369                  | 0.501  | 3.640   | 0.531             |       |       |         | 0.936         | 0.368  | 2.270   | 0.887             |         |       |        |
| Diabetes - 4                  | 1.361         | 0.319  | 5.640   | 0.667             |       |       |         | 1.366                  | 0.318  | 5.730   | 0.665             |       |       |         | 2.831         | 0.702  | 11.520  | 0.135             |         |       |        |
| Asthma                        | 1.670         | 0.496  | 5.540   | 0.396             |       |       |         | 1.233                  | 0.344  | 4.110   | 0.735             |       |       |         | 0.962         | 0.208  | 3.310   | 0.955             |         |       |        |
| COPD                          | <0.001        | <0.001 | >1000   | 0.992             |       |       |         | <0.001                 | <0.001 | >1000   | 0.992             |       |       |         | 0.812         | 0.179  | 3.140   | 0.771             |         |       |        |
| Dementia                      | <0.001        | <0.001 | >1000   | 0.988             |       |       |         | <0.001                 | <0.001 | >1000   | 0.988             |       |       |         | 3.443         | 1.430  | 8.680   | 0.007             |         |       |        |
| Stroke/TIA in patient history | 0.635         | 0.244  | 1.520   | 0.325             |       |       |         | 0.710                  | 0.272  | 1.710   | 0.461             |       |       |         | 1.002         | 0.453  | 2.160   | 0.996             |         |       |        |

|                                            |        |        |        |       |        |        |       |       |       |       |        |       |
|--------------------------------------------|--------|--------|--------|-------|--------|--------|-------|-------|-------|-------|--------|-------|
| Chronic kidney disease                     | 0.339  | 0.163  | 0.670  | 0.003 | 0.328  | 0.155  | 0.650 | 0.002 | 0.786 | 0.426 | 1.420  | 0.430 |
| Active smoker                              | 0.528  | 0.130  | 1.820  | 0.333 | 0.394  | 0.081  | 1.460 | 0.195 | 0.943 | 0.303 | 2.720  | 0.915 |
| Former smoker                              | 0.408  | 0.104  | 1.300  | 0.155 | 0.317  | 0.068  | 1.090 | 0.094 | 0.735 | 0.233 | 2.130  | 0.582 |
| Myocardial infarction in patient history   | 1.653  | 0.767  | 3.570  | 0.198 | 1.538  | 0.699  | 3.370 | 0.281 | 2.734 | 1.396 | 5.440  | 0.004 |
| Heart failure                              | 0.817  | 0.382  | 1.700  | 0.593 | 0.597  | 0.269  | 1.270 | 0.190 | 1.251 | 0.657 | 2.360  | 0.492 |
| Leukemia                                   | 3.027  | 0.705  | 13.700 | 0.133 | 1.118  | 0.205  | 4.950 | 0.887 | 4.871 | 1.190 | 24.420 | 0.033 |
| Solid malignant disease without metastases | 0.820  | 0.280  | 2.240  | 0.705 | 0.689  | 0.223  | 1.910 | 0.491 | 1.418 | 0.546 | 3.590  | 0.463 |
| Solid malignant disease with metastases    | <0.001 | <0.001 | >1000  | 0.993 | <0.001 | <0.001 | >1000 | 0.993 | 0.099 | 0.004 | 0.710  | 0.055 |
| Lymphoma                                   | <0.001 | <0.001 | >1000  | 0.992 | <0.001 | <0.001 | >1000 | 0.992 | 0.613 | 0.077 | 3.120  | 0.589 |
| Length of hospital stay                    | 1.021  | 1.007  | 1.040  | 0.003 | 1.021  | 1.007  | 1.040 | 0.004 | 0.992 | 0.978 | 1.010  | 0.257 |

OR: Odds Ratio; 95% CI: Confidence Interval; NG: Nagelkerke pseudo R<sup>2</sup>; LR: Likelihood Ratio; ICU: intensive care unit; TBIL: total bilirubin; ALP:alkaline phosphatase; Diabetes-1:diabetes mellitus type 1. including LADA; Diabetes-2: diabetes mellitus type 2 treated with oral medications; Diabetes-3: diabetes mellitus type 2 treated with insulin; Diabetes-4: prediabetes; COPD: chronic obstructive pulmonary disease; TIA: transient ischemic attack
